# Supplementary material for: De Novo Sequencing and Characterization of the Floral Transcriptome of Dendrocalamus latiflorus (Poaceae: Bambusoideae)
Source: PubMed Central journal article supplement (PMC3419236; doi:10.1371/journal.pone.0042082), 2012-08-14

**A**

## Length Distribution of Contigs - Phase 1

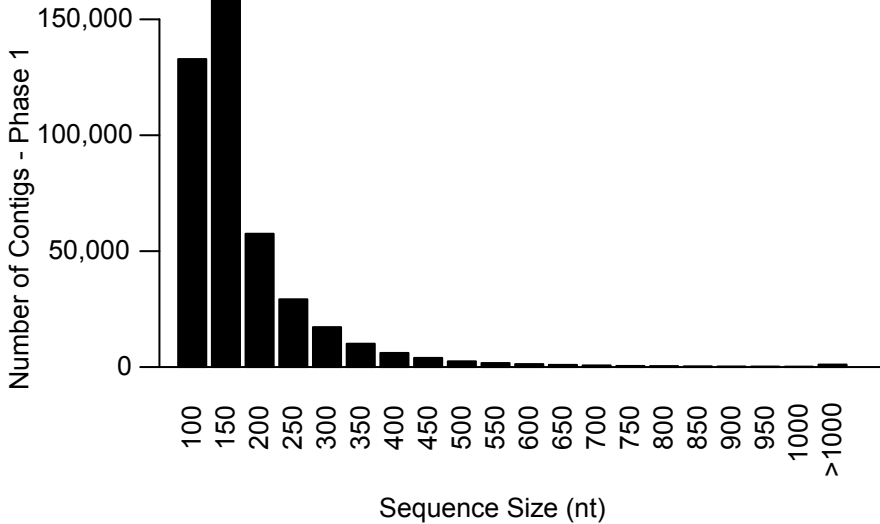

**B**

## Length Distribution of Contigs - Phase 2

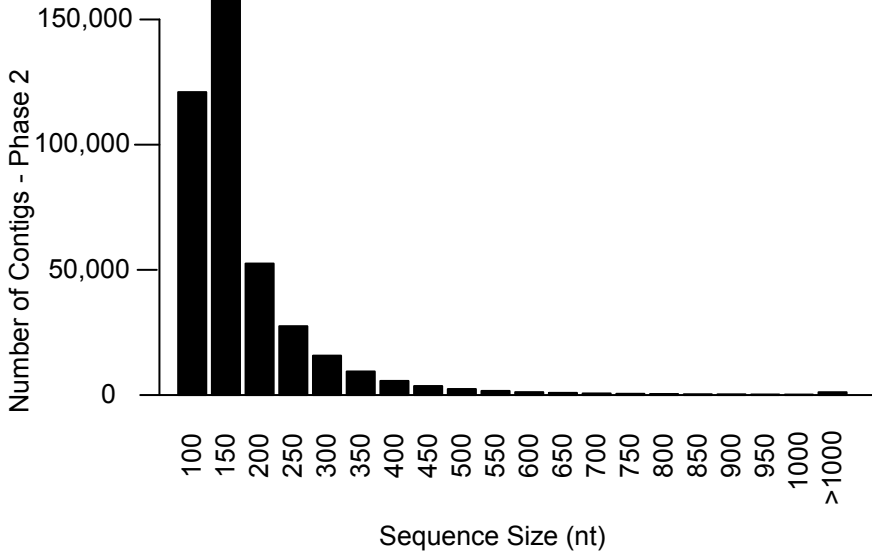

**C**

## Length Distribution of Scaffolds - Phase 1

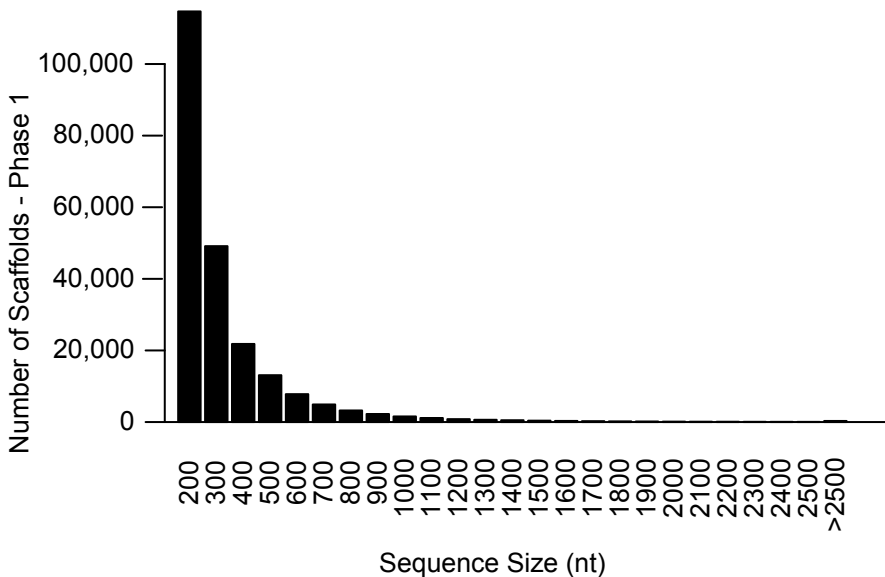

**D**

## Length Distribution of Scaffolds - Phase 2

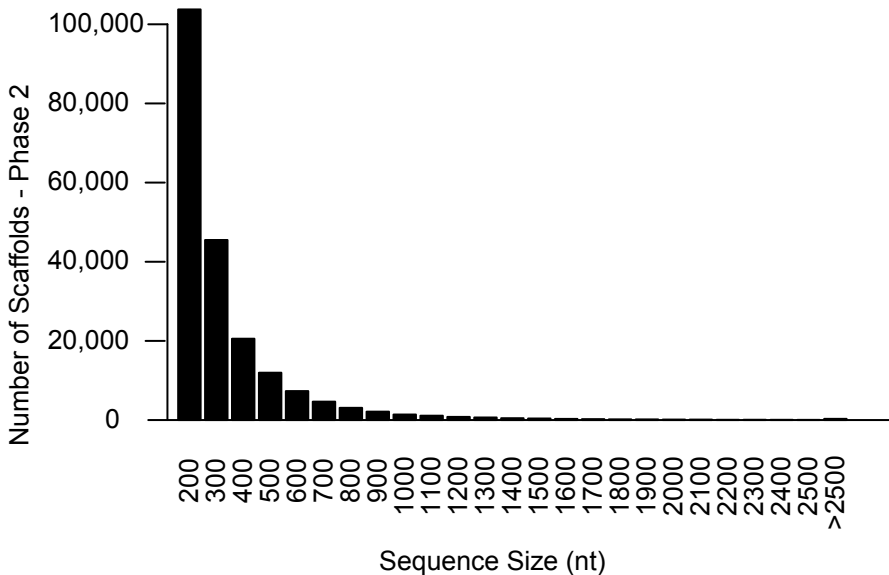

**E**

## Length Distribution of Unigenes - Phase 1

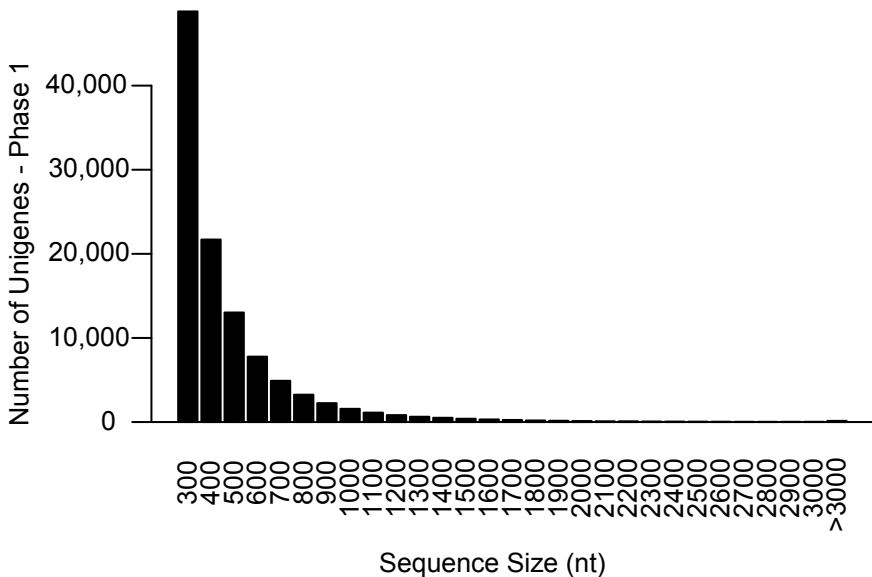

**F**

## Length Distribution of Unigenes - Phase 2

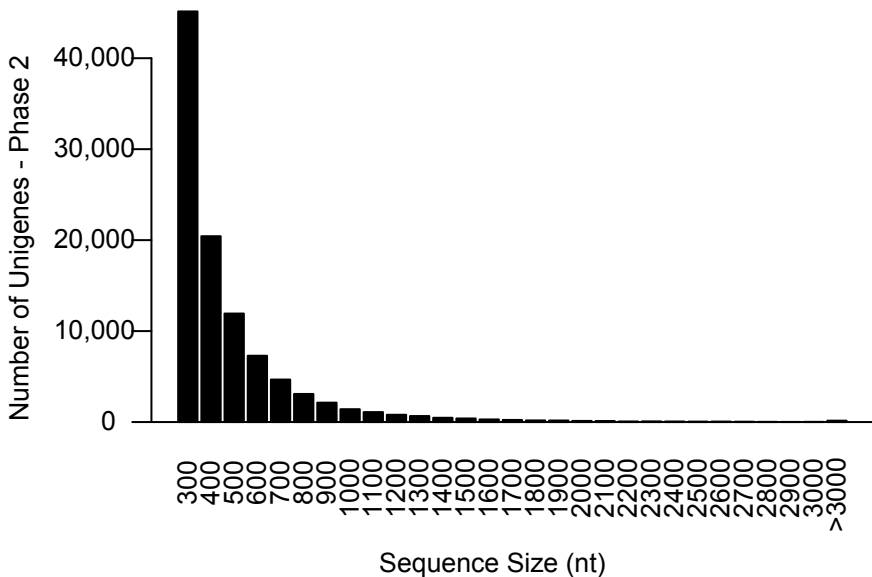

**G**

## Length Distribution of All-Unigenes

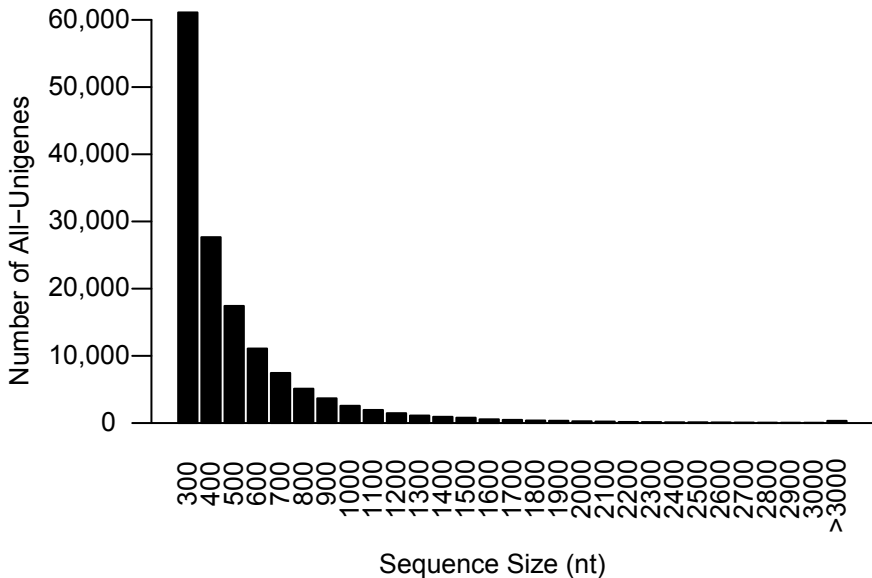

Supplement: pone.0042082.s001.pdf [file pone.0042082.s001.pdf]
