# Supplementary material for: De Novo Sequencing and Characterization of the Floral Transcriptome of Dendrocalamus latiflorus (Poaceae: Bambusoideae)
Source: PubMed Central journal article supplement (PMC3419236; doi:10.1371/journal.pone.0042082), 2012-08-14

**A**

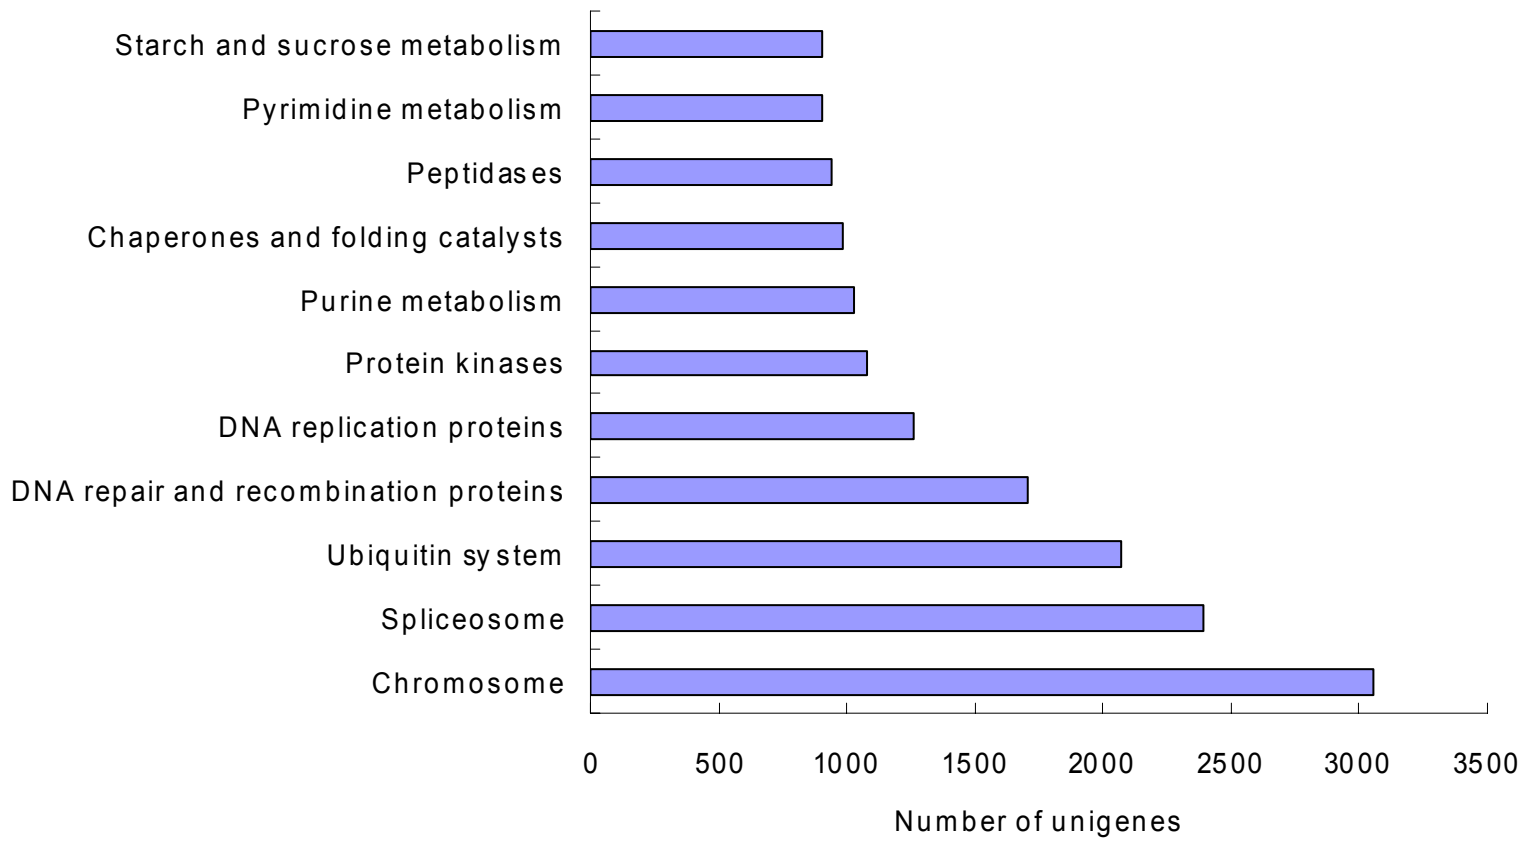

**B**

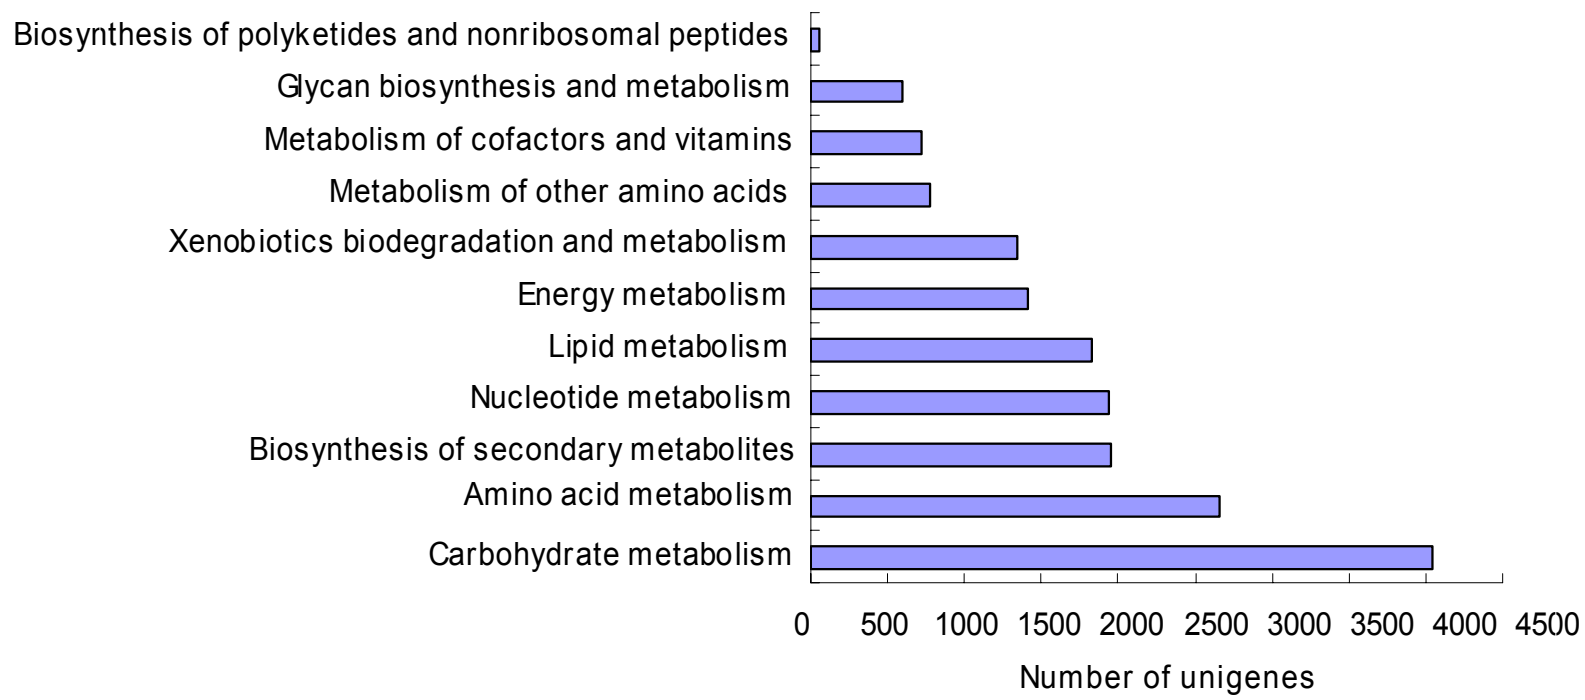

C

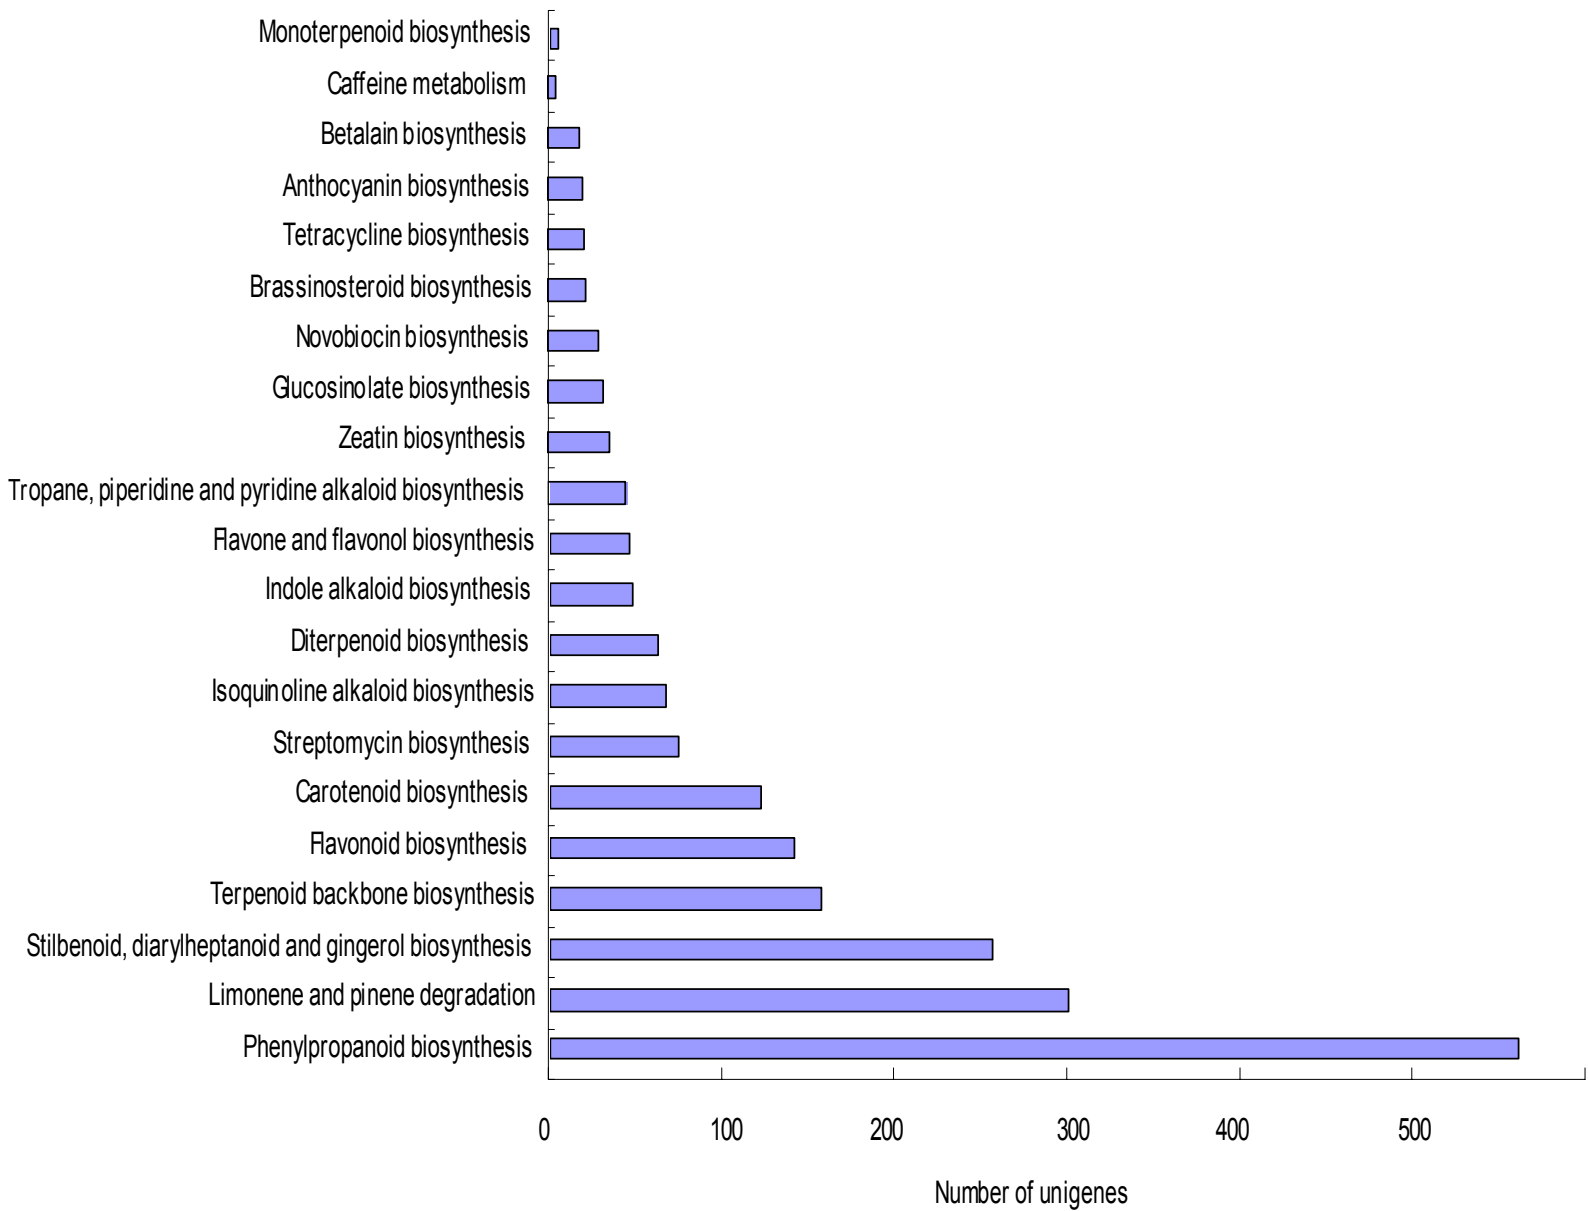

Supplement: pone.0042082.s003.pdf [file pone.0042082.s003.pdf]
