# Supplementary material for: De Novo Sequencing and Characterization of the Floral Transcriptome of Dendrocalamus latiflorus (Poaceae: Bambusoideae)
Source: PubMed Central journal article supplement (PMC3419236; doi:10.1371/journal.pone.0042082), 2012-08-14

# I. Arabidopsis

## Floral enabling pathway

## Floral promoting pathway

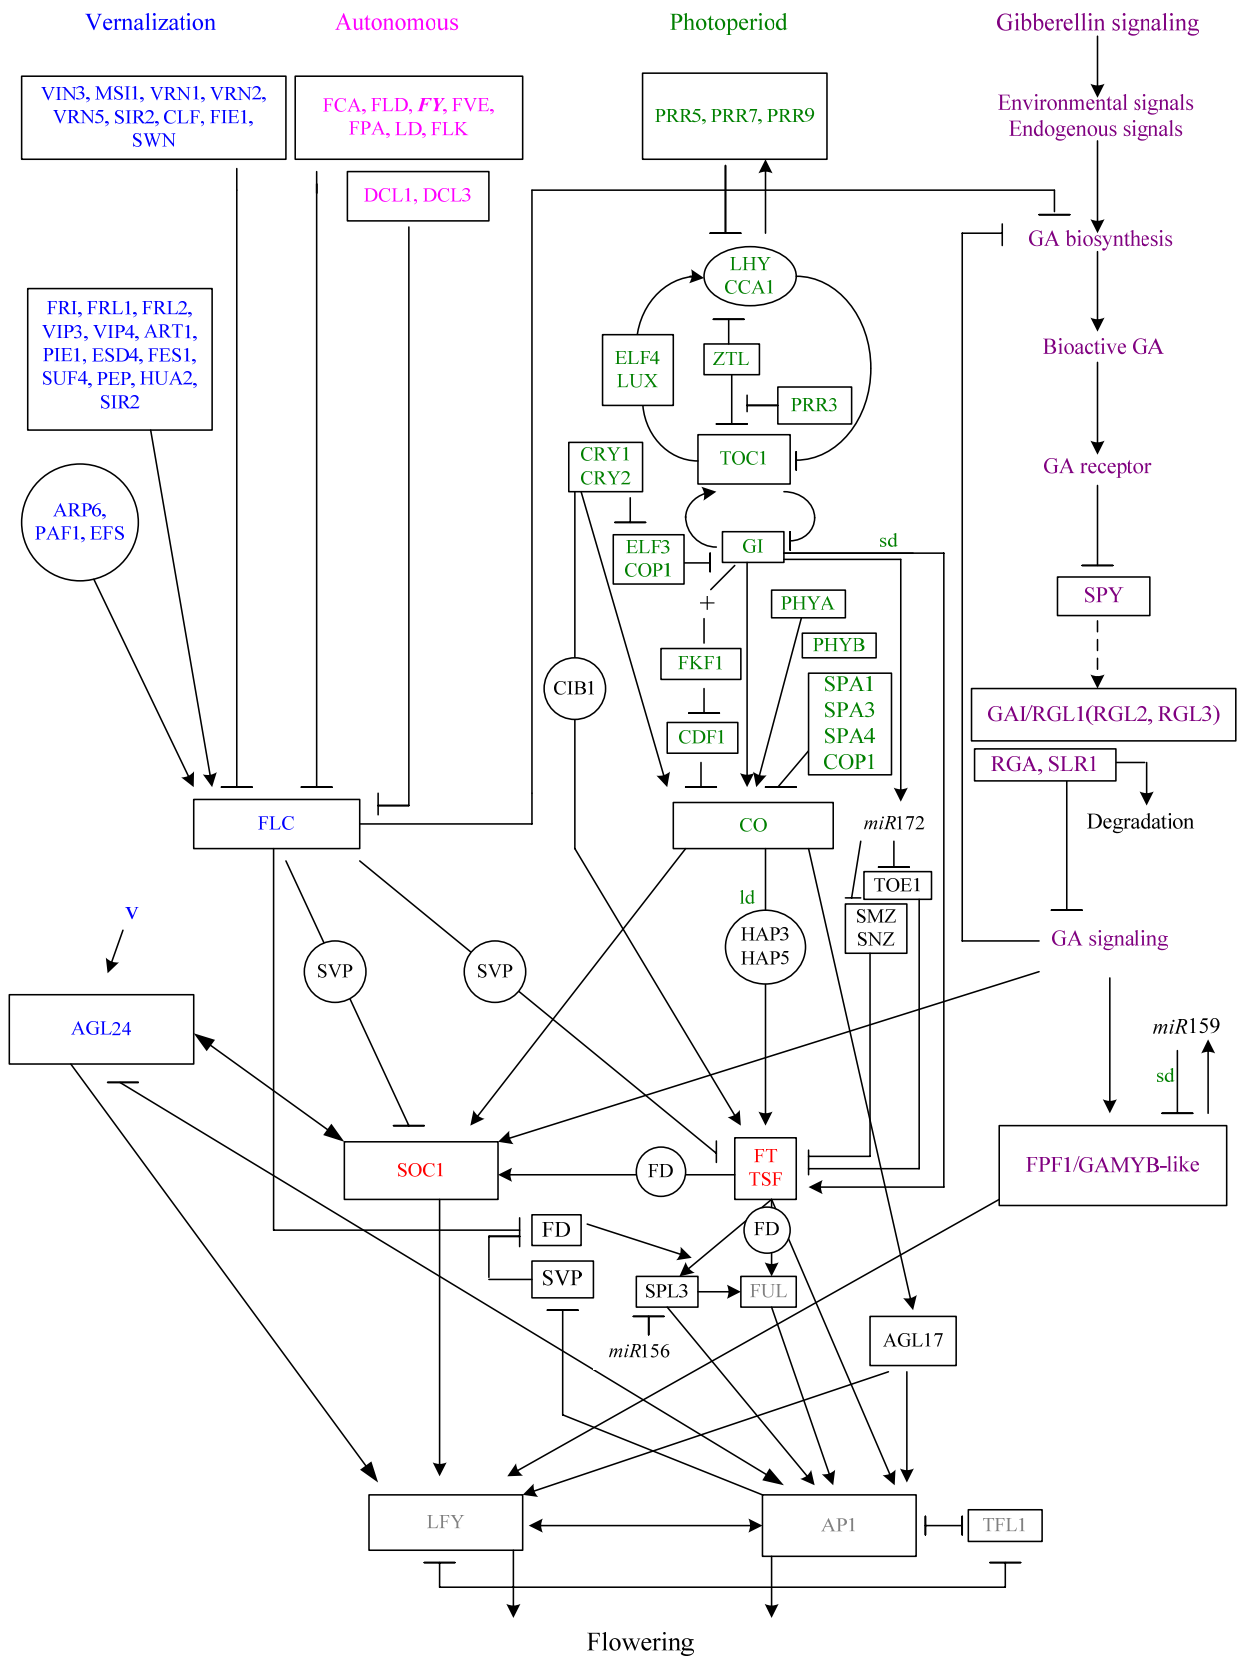

## II. Rice

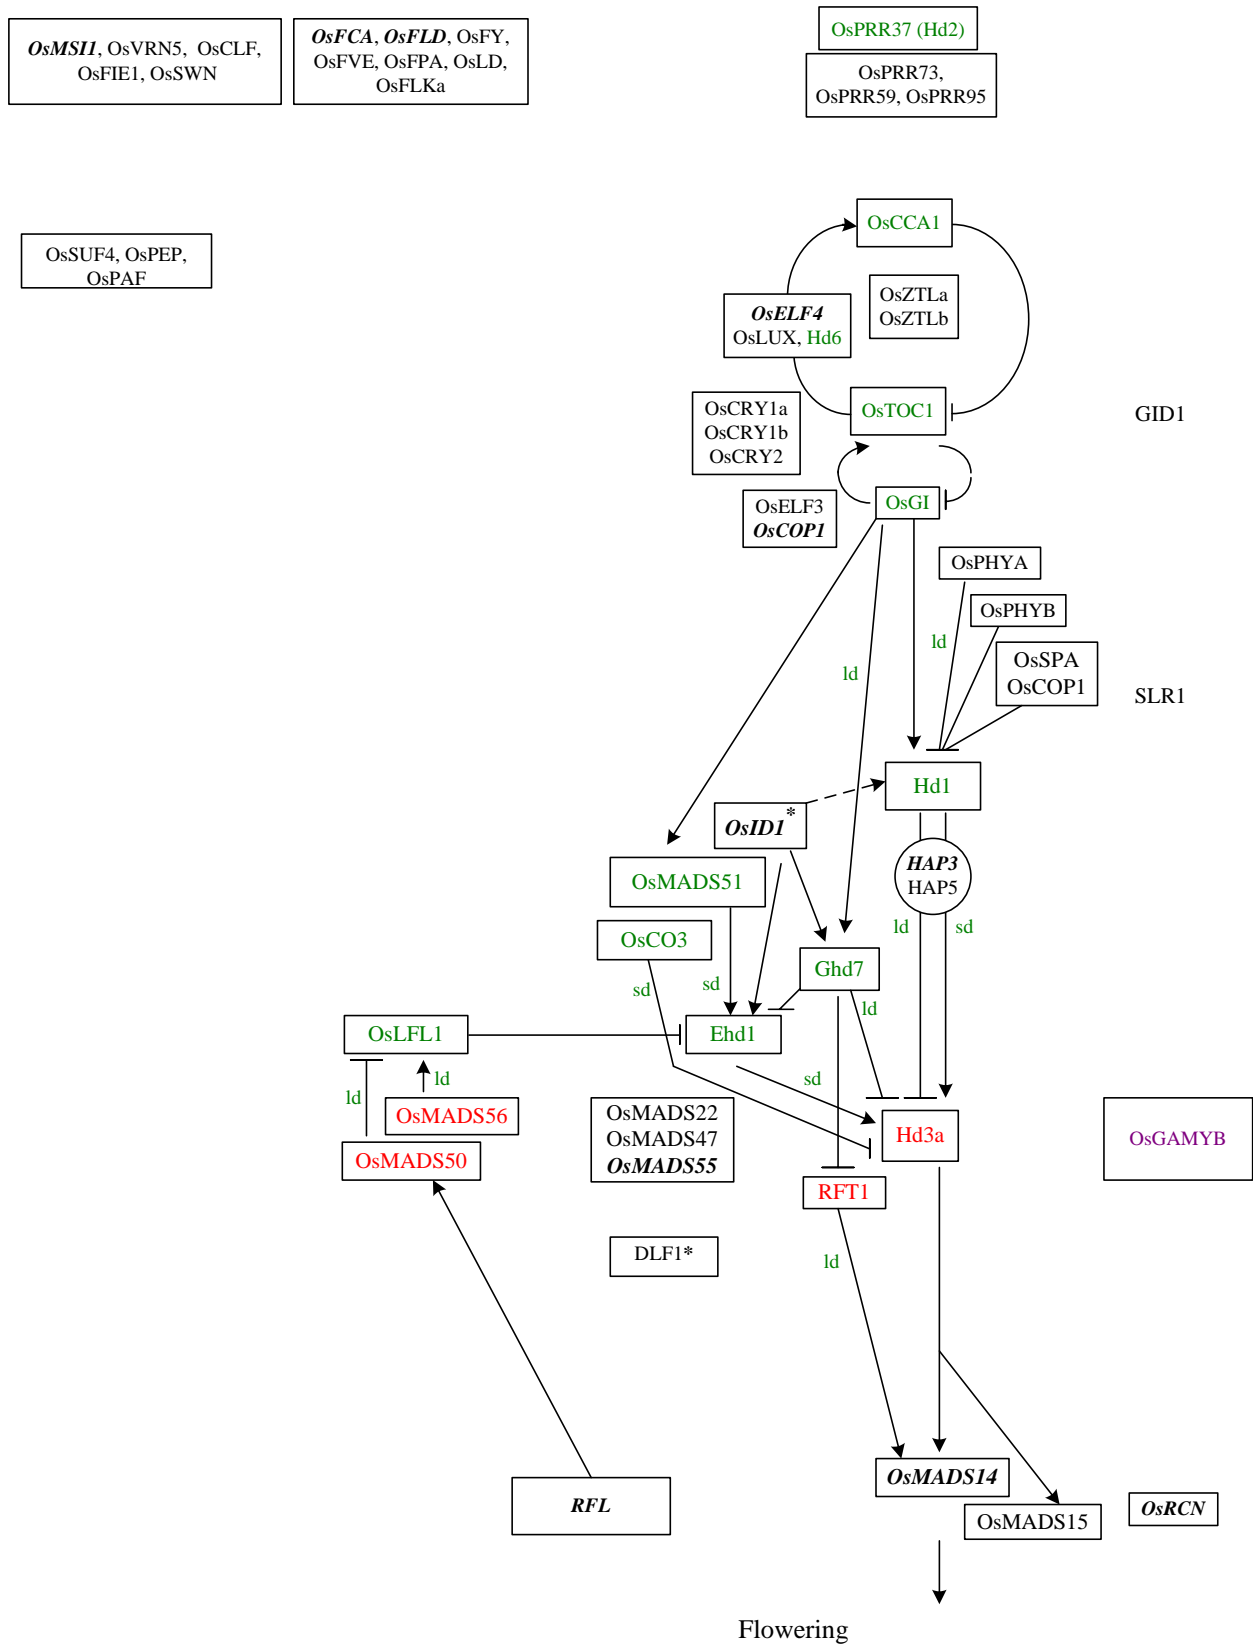

### III. Temperate grasses

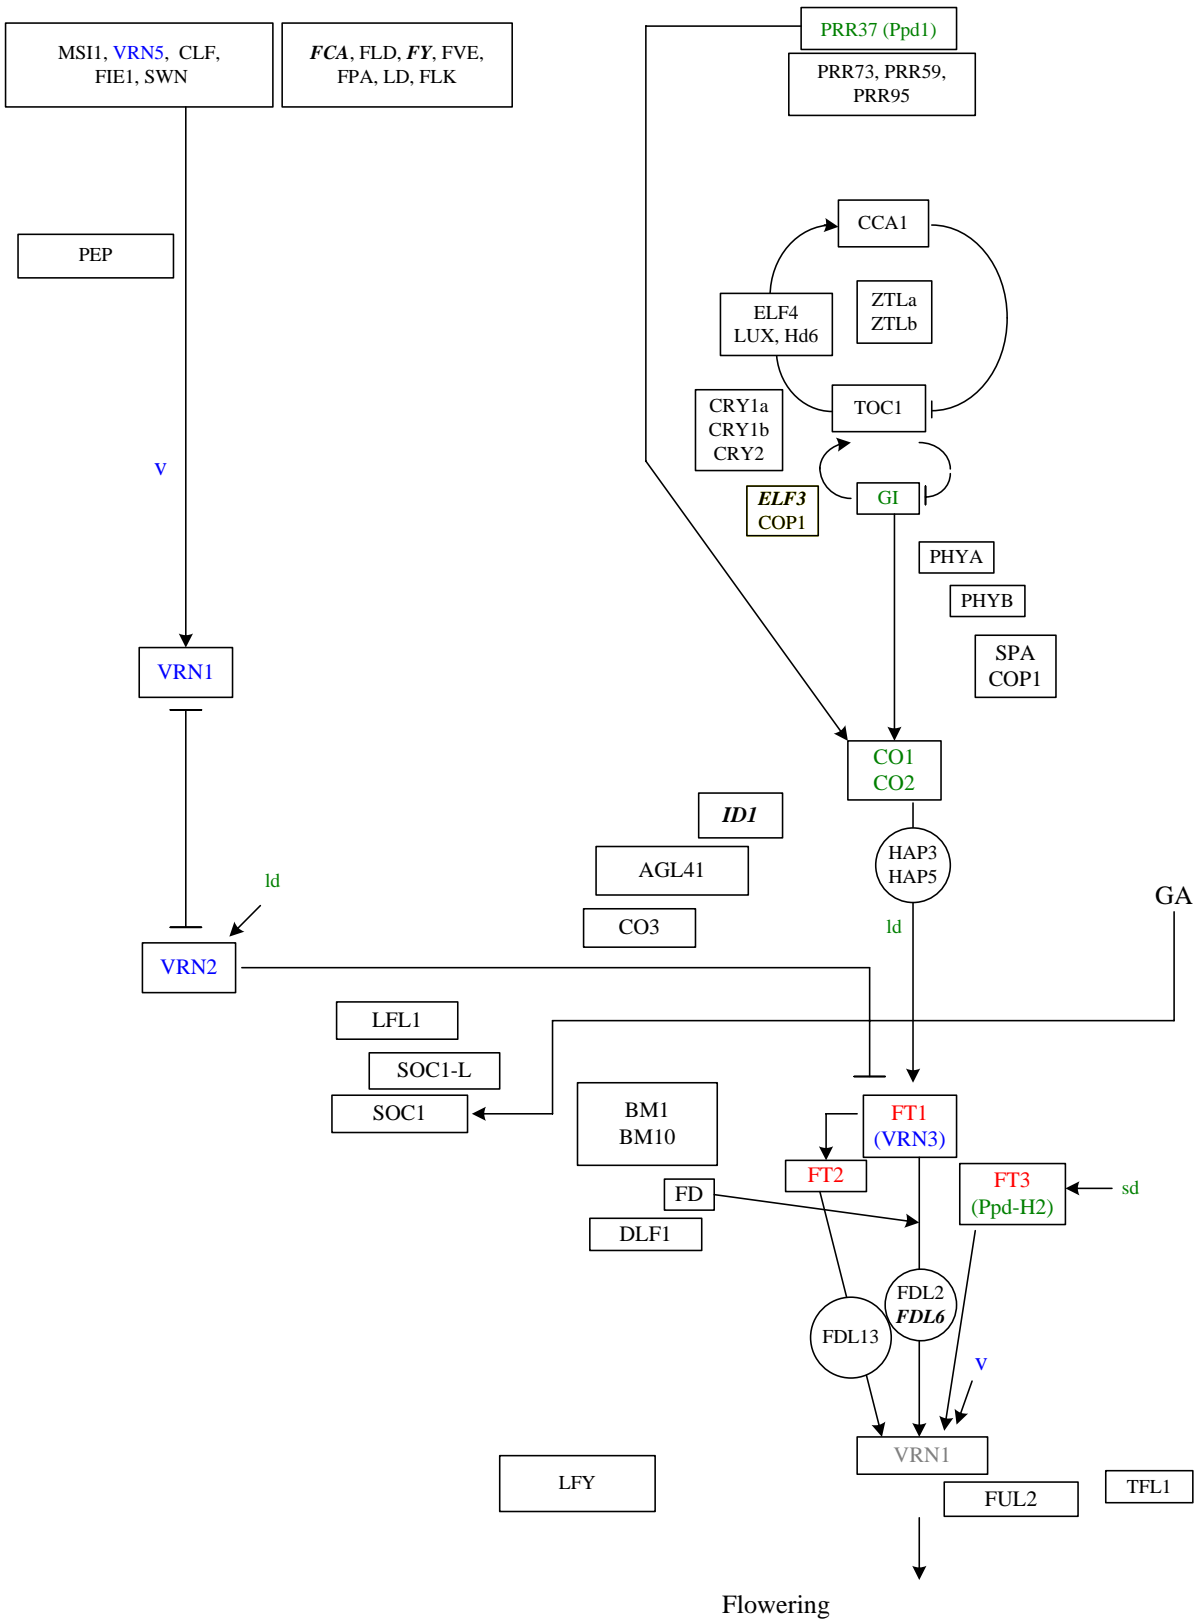

Supplement: pone.0042082.s004.pdf [file pone.0042082.s004.pdf]
