# Supplementary material for: De Novo Sequencing and Characterization of the Floral Transcriptome of Dendrocalamus latiflorus (Poaceae: Bambusoideae)
Source: PubMed Central journal article supplement (PMC3419236; doi:10.1371/journal.pone.0042082), 2012-08-14
Supplement: pone.0042082.s007.pdf [file pone.0042082.s007.pdf]

**Plant-specific GO terms significantly enriched for unigenes showing higher transcription in phase 1 (P<0.05)**

| <b>GO term ID</b> | <b>Name</b>                              | <b>adjusted P value</b> | <b>Unigene number</b> |
|-------------------|------------------------------------------|-------------------------|-----------------------|
| GO:0051234        | establishment of localization            | 3.91E-10                | 38                    |
| GO:0006810        | transport                                | 3.91E-10                | 38                    |
| GO:0005215        | transporter activity                     | 7.02E-09                | 29                    |
| GO:0005634        | nucleus                                  | 9.80E-09                | 172                   |
| GO:0090304        | nucleic acid metabolic process           | 4.58E-08                | 215                   |
| GO:0007049        | cell cycle                               | 4.65E-08                | 33                    |
| GO:0030528        | transcription regulator activity         | 5.21E-07                | 90                    |
| GO:0006350        | transcription                            | 5.23E-07                | 140                   |
| GO:0016020        | membrane                                 | 8.17E-07                | 238                   |
| GO:0044260        | cellular macromolecule metabolic process | 8.81E-07                | 351                   |
| GO:0044444        | cytoplasmic part                         | 2.01E-06                | 521                   |

|            |                                                      |          |     |
|------------|------------------------------------------------------|----------|-----|
| GO:0003824 | catalytic activity                                   | 5.13E-05 | 469 |
| GO:0005783 | endoplasmic reticulum                                | 8.55E-05 | 3   |
| GO:0006091 | generation of precursor metabolites and energy       | 1.06E-04 | 20  |
| GO:0003677 | DNA binding                                          | 1.25E-04 | 165 |
| GO:0043170 | macromolecule metabolic process                      | 2.52E-04 | 347 |
| GO:0016043 | cellular component organization                      | 3.64E-04 | 70  |
| GO:0005737 | cytoplasm                                            | 3.85E-04 | 403 |
| GO:0005623 | cell                                                 | 6.75E-04 | 32  |
| GO:0006629 | lipid metabolic process                              | 6.95E-04 | 17  |
| GO:0006412 | translation                                          | 6.95E-04 | 15  |
| GO:0003700 | transcription factor activity                        | 8.57E-04 | 51  |
| GO:0006519 | cellular amino acid and derivative metabolic process | 9.72E-04 | 19  |
| GO:0044281 | small molecule metabolic process                     | 9.72E-04 | 19  |

|            |                                                                       |          |     |
|------------|-----------------------------------------------------------------------|----------|-----|
| GO:0005773 | vacuole                                                               | 9.72E-04 | 1   |
| GO:0034641 | cellular nitrogen compound metabolic process                          | 0.001229 | 225 |
| GO:0006139 | nucleobase, nucleoside, nucleotide and nucleic acid metabolic process | 0.001229 | 225 |
| GO:0006807 | nitrogen compound metabolic process                                   | 0.001229 | 225 |
| GO:0016301 | kinase activity                                                       | 0.001393 | 165 |
| GO:0016772 | transferase activity, transferring phosphorus-containing groups       | 0.001393 | 165 |
| GO:0034645 | cellular macromolecule biosynthetic process                           | 0.001996 | 151 |
| GO:0009059 | macromolecule biosynthetic process                                    | 0.001996 | 151 |
| GO:0044249 | cellular biosynthetic process                                         | 0.001996 | 151 |
| GO:0003676 | nucleic acid binding                                                  | 0.002572 | 214 |
| GO:0005975 | carbohydrate metabolic process                                        | 0.003366 | 39  |
| GO:0044446 | intracellular organelle part                                          | 0.003366 | 1   |
| GO:0044422 | organelle part                                                        | 0.003366 | 1   |

|            |                              |          |      |
|------------|------------------------------|----------|------|
| GO:0044428 | nuclear part                 | 0.003366 | 1    |
| GO:0005198 | structural molecule activity | 0.003366 | 5    |
| GO:0044424 | intracellular part           | 0.00363  | 1050 |
| GO:0008152 | metabolic process            | 0.003814 | 491  |
| GO:0009056 | catabolic process            | 0.003814 | 44   |
| GO:0005739 | mitochondrion                | 0.005142 | 224  |
| GO:0005829 | cytosol                      | 0.005302 | 3    |
| GO:0015979 | photosynthesis               | 0.008717 | 1    |
| GO:0005794 | Golgi apparatus              | 0.013616 | 3    |
| GO:0004872 | receptor activity            | 0.014886 | 27   |
| GO:0030246 | carbohydrate binding         | 0.018145 | 16   |
| GO:0005840 | ribosome                     | 0.018791 | 5    |
| GO:0032991 | macromolecular complex       | 0.018791 | 5    |

|            |                                               |          |     |
|------------|-----------------------------------------------|----------|-----|
| GO:0030529 | ribonucleoprotein complex                     | 0.018791 | 5   |
| GO:0006259 | DNA metabolic process                         | 0.021505 | 13  |
| GO:0005576 | extracellular region                          | 0.022077 | 26  |
| GO:0005730 | nucleolus                                     | 0.025346 | 3   |
| GO:0043412 | macromolecule modification                    | 0.029804 | 131 |
| GO:0006464 | protein modification process                  | 0.029804 | 131 |
| GO:0004518 | nuclease activity                             | 0.038541 | 2   |
| GO:0016788 | hydrolase activity, acting on ester bonds     | 0.038541 | 2   |
| GO:0044464 | cell part                                     | 0.042332 | 13  |
| GO:0016462 | pyrophosphatase activity                      | 0.042332 | 13  |
| GO:0017111 | nucleoside-triphosphatase activity            | 0.042332 | 13  |
| GO:0003774 | motor activity                                | 0.042332 | 13  |
| GO:0016817 | hydrolase activity, acting on acid anhydrides | 0.042332 | 13  |

|            |                                                                                    |          |    |
|------------|------------------------------------------------------------------------------------|----------|----|
| GO:0016818 | hydrolase activity, acting on acid anhydrides, in phosphorus-containing anhydrides | 0.042332 | 13 |
| GO:0005856 | cytoskeleton                                                                       | 0.044912 | 20 |

---

### Plant-specific GO terms significantly enriched for unigenes showing higher transcription in phase 2 (P<0.05)

| GO term ID | Name                                     | adjusted P value | Unigene number |
|------------|------------------------------------------|------------------|----------------|
| GO:0044260 | cellular macromolecule metabolic process | 4.85E-11         | 224            |
| GO:0043229 | intracellular organelle                  | 4.85E-11         | 632            |
| GO:0043231 | intracellular membrane-bounded organelle | 4.85E-11         | 609            |
| GO:0009536 | plastid                                  | 4.85E-11         | 298            |
| GO:0043227 | membrane-bounded organelle               | 4.85E-11         | 609            |
| GO:0043170 | macromolecule metabolic process          | 4.85E-11         | 267            |
| GO:0043226 | organelle                                | 4.85E-11         | 632            |
| GO:0044444 | cytoplasmic part                         | 4.85E-11         | 548            |
| GO:0005739 | mitochondrion                            | 5.76E-11         | 221            |
| GO:0005515 | protein binding                          | 5.76E-11         | 97             |

---

|            |                                                                       |          |     |
|------------|-----------------------------------------------------------------------|----------|-----|
| GO:0003676 | nucleic acid binding                                                  | 1.79E-10 | 142 |
| GO:0005622 | intracellular                                                         | 1.86E-09 | 24  |
| GO:0005215 | transporter activity                                                  | 2.91E-09 | 142 |
| GO:0016020 | membrane                                                              | 2.91E-09 | 482 |
| GO:0005737 | cytoplasm                                                             | 2.91E-09 | 516 |
| GO:0019538 | protein metabolic process                                             | 2.59E-08 | 145 |
| GO:0034641 | cellular nitrogen compound metabolic process                          | 1.34E-07 | 170 |
| GO:0006139 | nucleobase, nucleoside, nucleotide and nucleic acid metabolic process | 1.34E-07 | 170 |
| GO:0006807 | nitrogen compound metabolic process                                   | 1.34E-07 | 170 |
| GO:0090304 | nucleic acid metabolic process                                        | 2.38E-07 | 138 |
| GO:0005634 | nucleus                                                               | 6.20E-07 | 80  |
| GO:0006259 | DNA metabolic process                                                 | 7.11E-07 | 40  |

---



---

|            |                                    |          |      |
|------------|------------------------------------|----------|------|
| GO:0003723 | RNA binding                        | 1.06E-06 | 19   |
| GO:0051234 | establishment of localization      | 1.51E-06 | 156  |
| GO:0006810 | transport                          | 1.51E-06 | 156  |
| GO:0043412 | macromolecule modification         | 1.90E-06 | 72   |
| GO:0006464 | protein modification process       | 1.90E-06 | 72   |
| GO:0044267 | cellular protein metabolic process | 1.90E-06 | 90   |
| GO:0065007 | biological regulation              | 4.90E-05 | 32   |
| GO:0009987 | cellular process                   | 1.03E-04 | 542  |
| GO:0050789 | regulation of biological process   | 1.20E-04 | 28   |
| GO:0044424 | intracellular part                 | 1.20E-04 | 1078 |
| GO:0007049 | cell cycle                         | 1.29E-04 | 3    |
| GO:0023046 | signaling process                  | 1.29E-04 | 28   |

---

---

|            |                                 |          |     |
|------------|---------------------------------|----------|-----|
| GO:0007165 | signal transduction             | 1.29E-04 | 28  |
| GO:0023060 | signal transmission             | 1.29E-04 | 28  |
| GO:0050794 | regulation of cellular process  | 1.29E-04 | 28  |
| GO:0044237 | cellular metabolic process      | 2.38E-04 | 362 |
| GO:0005488 | binding                         | 2.82E-04 | 665 |
| GO:0016740 | transferase activity            | 3.07E-04 | 231 |
| GO:0003677 | DNA binding                     | 3.26E-04 | 121 |
| GO:0003682 | chromatin binding               | 6.15E-04 | 5   |
| GO:0016043 | cellular component organization | 8.00E-04 | 22  |
| GO:0060089 | molecular transducer activity   | 0.001292 | 18  |
| GO:0004871 | signal transducer activity      | 0.001292 | 18  |
| GO:0044238 | primary metabolic process       | 0.002297 | 489 |

---

---

|            |                                                                                    |          |     |
|------------|------------------------------------------------------------------------------------|----------|-----|
| GO:0034645 | cellular macromolecule biosynthetic process                                        | 0.002577 | 113 |
| GO:0009059 | macromolecule biosynthetic process                                                 | 0.002577 | 113 |
| GO:0044249 | cellular biosynthetic process                                                      | 0.002577 | 113 |
| GO:0016301 | kinase activity                                                                    | 0.002652 | 104 |
| GO:0016772 | transferase activity, transferring phosphorus-containing groups                    | 0.002652 | 104 |
| GO:0006350 | transcription                                                                      | 0.003068 | 53  |
| GO:0017111 | nucleoside-triphosphatase activity                                                 | 0.004415 | 1   |
| GO:0016462 | pyrophosphatase activity                                                           | 0.004415 | 1   |
| GO:0016817 | hydrolase activity, acting on acid anhydrides                                      | 0.004415 | 1   |
| GO:0003774 | motor activity                                                                     | 0.004415 | 1   |
| GO:0016818 | hydrolase activity, acting on acid anhydrides, in phosphorus-containing anhydrides | 0.004415 | 1   |
| GO:0005794 | Golgi apparatus                                                                    | 0.006617 | 3   |

---

---

|            |                                                |          |     |
|------------|------------------------------------------------|----------|-----|
| GO:0006091 | generation of precursor metabolites and energy | 0.010045 | 5   |
| GO:0006950 | response to stress                             | 0.011691 | 73  |
| GO:0005975 | carbohydrate metabolic process                 | 0.011691 | 87  |
| GO:0003824 | catalytic activity                             | 0.011691 | 690 |
| GO:0005777 | peroxisome                                     | 0.011691 | 16  |
| GO:0042579 | microbody                                      | 0.011691 | 16  |
| GO:0006629 | lipid metabolic process                        | 0.011691 | 68  |
| GO:0019748 | secondary metabolic process                    | 0.014342 | 32  |
| GO:0000166 | nucleotide binding                             | 0.017742 | 214 |
| GO:0005623 | cell                                           | 0.018543 | 176 |
| GO:0005576 | extracellular region                           | 0.021554 | 34  |
| GO:0016265 | death                                          | 0.021554 | 34  |

---

---

|            |                                                   |          |    |
|------------|---------------------------------------------------|----------|----|
| GO:0008219 | cell death                                        | 0.021554 | 34 |
| GO:0030529 | ribonucleoprotein complex                         | 0.021554 | 34 |
| GO:0032991 | macromolecular complex                            | 0.021554 | 34 |
| GO:0005840 | ribosome                                          | 0.021554 | 34 |
| GO:0031975 | envelope                                          | 0.025861 | 18 |
| GO:0031967 | organelle envelope                                | 0.025861 | 18 |
| GO:0005635 | nuclear envelope                                  | 0.025861 | 18 |
| GO:0005618 | cell wall                                         | 0.037573 | 7  |
| GO:0030312 | external encapsulating structure                  | 0.04165  | 5  |
| GO:0008135 | translation factor activity, nucleic acid binding | 0.046677 | 2  |

---
