# Supplementary material for: De Novo Sequencing and Characterization of the Floral Transcriptome of Dendrocalamus latiflorus (Poaceae: Bambusoideae)
Source: PubMed Central journal article supplement (PMC3419236; doi:10.1371/journal.pone.0042082), 2012-08-14
Supplement: pone.0042082.s008.pdf [file pone.0042082.s008.pdf]

**KEGG pathways significantly enriched for unigenes showing higher transcription in phase 1 (P<0.05)**

| Pathway names                           | ko names | adjusted P value | Unigene number |
|-----------------------------------------|----------|------------------|----------------|
| Cell cycle                              | ko04110  | 0.00E+00         | 166            |
| DNA replication                         | ko03030  | 0.00E+00         | 112            |
| DNA replication proteins                | ko03032  | 0.00E+00         | 358            |
| DNA repair and recombination proteins   | ko03400  | 3.69E-14         | 327            |
| Cytoskeleton proteins                   | ko04812  | 5.87E-10         | 101            |
| Chromosome                              | ko03036  | 4.31E-09         | 495            |
| Mismatch repair                         | ko03430  | 4.40E-07         | 49             |
| Base excision repair                    | ko03410  | 8.54E-06         | 63             |
| Progesterone-mediated oocyte maturation | ko04914  | 1.36E-05         | 54             |
| Homologous recombination                | ko03440  | 1.32E-04         | 43             |
| Pyrimidine metabolism                   | ko00240  | 1.92E-04         | 156            |
| Nucleotide excision repair              | ko03420  | 4.33E-04         | 64             |
| Primary immunodeficiency                | ko05340  | 7.53E-03         | 4              |
| p53 signaling pathway                   | ko04115  | 1.38E-02         | 34             |
| Purine metabolism                       | ko00230  | 2.46E-02         | 159            |
| Transcription factors                   | ko03000  | 2.74E-02         | 140            |

**KEGG pathways significantly enriched for unigenes showing higher transcription  
in phase 2 (P<0.05)**

| Pathway names                                          | Ko names | adjusted P value | Unigene number |
|--------------------------------------------------------|----------|------------------|----------------|
| gamma-Hexachlorocyclohexane degradation                | ko00361  | 0.00E+00         | 118            |
| Limonene and pinene degradation                        | ko00903  | 0.00E+00         | 116            |
| Naphthalene and anthracene degradation                 | ko00626  | 0.00E+00         | 105            |
| Phenylpropanoid biosynthesis                           | ko00940  | 0.00E+00         | 140            |
| Starch and sucrose metabolism                          | ko00500  | 0.00E+00         | 211            |
| Stilbenoid, diarylheptanoid and gingerol biosynthesis  | ko00945  | 0.00E+00         | 110            |
| Flavonoid biosynthesis                                 | ko00941  | 2.66E-15         | 54             |
| Galactose metabolism                                   | ko00052  | 2.66E-15         | 81             |
| Nitrogen metabolism                                    | ko00910  | 2.89E-13         | 64             |
| Cytochrome P450                                        | ko00199  | 1.22E-12         | 56             |
| Pentose and glucuronate interconversions               | ko00040  | 1.60E-12         | 64             |
| Cyanoamino acid metabolism                             | ko00460  | 1.26E-11         | 67             |
| Isoquinoline alkaloid biosynthesis                     | ko00950  | 2.09E-11         | 30             |
| Linoleic acid metabolism                               | ko00591  | 5.14E-11         | 40             |
| alpha-Linolenic acid metabolism                        | ko00592  | 6.89E-11         | 56             |
| Tyrosine metabolism                                    | ko00350  | 6.89E-11         | 56             |
| Tryptophan metabolism                                  | ko00380  | 4.00E-10         | 63             |
| Phenylalanine metabolism                               | ko00360  | 2.04E-09         | 71             |
| Styrene degradation                                    | ko00643  | 2.41E-07         | 15             |
| D-Glutamine and D-glutamate metabolism                 | ko00471  | 5.72E-07         | 7              |
| Metabolism of xenobiotics by cytochrome P450           | ko00980  | 1.79E-06         | 40             |
| Drug metabolism - cytochrome P450                      | ko00982  | 4.28E-06         | 42             |
| Indole alkaloid biosynthesis                           | ko00901  | 5.29E-06         | 18             |
| Brassinosteroid biosynthesis                           | ko00905  | 1.13E-05         | 11             |
| 3-Chloroacrylic acid degradation                       | ko00641  | 1.80E-05         | 24             |
| Anthocyanin biosynthesis                               | ko00942  | 2.45E-05         | 10             |
| Retinol metabolism                                     | ko00830  | 3.03E-05         | 25             |
| beta-Alanine metabolism                                | ko00410  | 6.01E-05         | 33             |
| Valine, leucine and isoleucine degradation             | ko00280  | 6.01E-05         | 38             |
| Fatty acid metabolism                                  | ko00071  | 7.99E-05         | 46             |
| Steroid biosynthesis                                   | ko00100  | 8.98E-05         | 34             |
| Alanine, aspartate and glutamate metabolism            | ko00250  | 1.13E-04         | 46             |
| Tropane, piperidine and pyridine alkaloid biosynthesis | ko00960  | 1.35E-04         | 15             |

|                                                            |         |          |     |
|------------------------------------------------------------|---------|----------|-----|
| Olfactory transduction                                     | ko04740 | 1.40E-04 | 28  |
| Biosynthesis of unsaturated fatty acids                    | ko01040 | 2.10E-04 | 27  |
| ABC transporters                                           | ko02010 | 3.12E-04 | 55  |
| Taurine and hypotaurine metabolism                         | ko00430 | 3.12E-04 | 10  |
| Transporters                                               | ko02000 | 4.67E-04 | 66  |
| Glycolysis / Gluconeogenesis                               | ko00010 | 5.46E-04 | 84  |
| Sphingolipid metabolism                                    | ko00600 | 6.34E-04 | 34  |
| Methane metabolism                                         | ko00680 | 6.44E-04 | 44  |
| Nicotinate and nicotinamide metabolism                     | ko00760 | 7.37E-04 | 16  |
| Neurotrophin signaling pathway                             | ko04722 | 8.68E-04 | 74  |
| Diterpenoid biosynthesis                                   | ko00904 | 9.31E-04 | 17  |
| 1,2-Dichloroethane degradation                             | ko00631 | 1.37E-03 | 10  |
| Zeatin biosynthesis                                        | ko00908 | 1.43E-03 | 12  |
| Betalain biosynthesis                                      | ko00965 | 2.02E-03 | 7   |
| Flavone and flavonol biosynthesis                          | ko00944 | 2.02E-03 | 13  |
| Terpenoid backbone biosynthesis                            | ko00900 | 2.46E-03 | 32  |
| GnRH signaling pathway                                     | ko04912 | 5.96E-03 | 52  |
| Carotenoid biosynthesis                                    | ko00906 | 6.85E-03 | 25  |
| Glyoxylate and dicarboxylate metabolism                    | ko00630 | 8.73E-03 | 27  |
| Arginine and proline metabolism                            | ko00330 | 1.24E-02 | 38  |
| 1- and 2-Methylnaphthalene degradation                     | ko00624 | 1.62E-02 | 15  |
| Glycosphingolipid biosynthesis - globoseries               | ko00603 | 1.62E-02 | 13  |
| PPAR signaling pathway                                     | ko03320 | 1.66E-02 | 24  |
| Apoptosis                                                  | ko04210 | 1.70E-02 | 39  |
| Oxidative phosphorylation                                  | ko00190 | 1.76E-02 | 69  |
| Cellular antigens                                          | ko04090 | 1.90E-02 | 33  |
| C21-Steroid hormone metabolism                             | ko00140 | 2.20E-02 | 2   |
| Carbon fixation in photosynthetic organisms                | ko00710 | 2.20E-02 | 48  |
| Monoterpenoid biosynthesis                                 | ko00902 | 2.20E-02 | 2   |
| Transcription factors                                      | ko03000 | 2.20E-02 | 136 |
| Glucosinolate biosynthesis                                 | ko00966 | 2.71E-02 | 8   |
| Other glycan degradation                                   | ko00511 | 2.83E-02 | 23  |
| Glycosphingolipid biosynthesis - lacto and neolacto series | ko00601 | 2.91E-02 | 5   |
| Lipid biosynthesis proteins                                | ko01004 | 3.08E-02 | 41  |
| Glycosaminoglycan degradation                              | ko00531 | 3.45E-02 | 10  |
| Glycerophospholipid metabolism                             | ko00564 | 3.53E-02 | 53  |
| Ether lipid metabolism                                     | ko00565 | 3.75E-02 | 31  |

---

|                                        |         |          |    |
|----------------------------------------|---------|----------|----|
| Propanoate metabolism                  | ko00640 | 4.03E-02 | 27 |
| Benzoate degradation via hydroxylation | ko00362 | 4.29E-02 | 2  |

---
