# Supplementary material for: De Novo Sequencing and Characterization of the Floral Transcriptome of Dendrocalamus latiflorus (Poaceae: Bambusoideae)
Source: PubMed Central journal article supplement (PMC3419236; doi:10.1371/journal.pone.0042082), 2012-08-14
Supplement: pone.0042082.s009.pdf [file pone.0042082.s009.pdf]

**Table 2 Representatives of putative flowering-time genes in *Dendrocalamus latiflorus***

| Representative unigene ID  | Unigene Length | Accession number<br>(Protein) | Identity | Align length<br>(Amino acid) | E-value  | Protein function (species)                           | Transcription<br>factor family |
|----------------------------|----------------|-------------------------------|----------|------------------------------|----------|------------------------------------------------------|--------------------------------|
| <b>Photoperiod pathway</b> |                |                               |          |                              |          |                                                      |                                |
| Unigene71172_All           | 884            | AAL99264                      | 0.79     | 177                          | 6.00E-66 | CO5 [ <i>Hordeum vulgare</i> subsp. <i>vulgare</i> ] | C2C2-CO-like                   |
| Unigene6072_All            | 806            | AAL99264                      | 0.82     | 147                          | 6.00E-58 | CO5 [ <i>Hordeum vulgare</i> subsp. <i>vulgare</i> ] | C2C2-CO-like                   |
| Unigene112514_All          | 1078           | NP_001148229                  | 0.76     | 134                          | 6.00E-98 | CO6 [ <i>Zea mays</i> ]                              | C2C2-CO-like                   |
| Unigene116927_All          | 232            | NP_001148229                  | 0.75     | 81                           | 8.00E-25 | CO6 [ <i>Zea mays</i> ]                              | C2C2-CO-like                   |
| Unigene124635_All          | 436            | NP_001148229                  | 0.85     | 70                           | 1.00E-32 | CO6 [ <i>Zea mays</i> ]                              | C2C2-CO-like                   |
| Unigene49735_All           | 564            | AAL99269                      | 0.66     | 42                           | 3.00E-07 | CO7 [ <i>Hordeum vulgare</i> subsp. <i>vulgare</i> ] |                                |
| Unigene17806_All           | 419            | AAL99270                      | 0.71     | 140                          | 5.00E-42 | CO8 [ <i>Hordeum vulgare</i> subsp. <i>vulgare</i> ] | C2C2-CO-like                   |
| Unigene142123_All          | 266            | NP_001148275                  | 0.76     | 94                           | 2.00E-29 | CO8 [ <i>Zea mays</i> ]                              | C2C2-CO-like                   |
| Unigene34101_All           | 620            | ABL11477                      | 0.73     | 169                          | 5.00E-63 | ELF3 [ <i>Triticum aestivum</i> ]                    |                                |
| Unigene35958_All           | 248            | ABL11477                      | 0.68     | 79                           | 2.00E-23 | ELF3 [ <i>Triticum aestivum</i> ]                    |                                |
| Unigene36395_All           | 376            | ABL11477                      | 0.64     | 129                          | 3.00E-33 | ELF3 [ <i>Triticum aestivum</i> ]                    |                                |
| Unigene40975_All           | 1128           | ABL11477                      | 0.64     | 211                          | 2.00E-84 | ELF3 [ <i>Triticum aestivum</i> ]                    |                                |
| Unigene1217_All            | 825            | ABL1147                       | 0.66     | 283                          | 2.00E-90 | ELF3 [ <i>Triticum aestivum</i> ]                    |                                |
| Unigene86406_All           | 261            | ABL11477                      | 0.96     | 30                           | 6.00E-08 | ELF3 [ <i>Triticum aestivum</i> ]                    |                                |
| Unigene63386_All           | 384            | ABA94824                      | 0.8      | 46                           | 2.00E-12 | ELF4 [ <i>Oryza sativa</i> subsp. <i>japonica</i> ]  |                                |
| Unigene123448_All          | 355            | ABA94824                      | 0.95     | 73                           | 1.00E-33 | ELF4 [ <i>Oryza sativa</i> subsp. <i>japonica</i> ]  |                                |
| Unigene123585_All          | 326            | ABA94824                      | 0.93     | 33                           | 4.00E-10 | ELF4 [ <i>Oryza sativa</i> subsp. <i>japonica</i> ]  |                                |
| Unigene31669_All           | 404            | NP_001148036                  | 0.83     | 55                           | 1.00E-15 | ELF4 [ <i>Zea mays</i> ]                             |                                |
| Unigene23923_All           | 325            | NP_001148036                  | 0.87     | 55                           | 1.00E-16 | ELF4 [ <i>Zea mays</i> ]                             |                                |
| Unigene158_All             | 966            | BAA94422                      | 0.93     | 321                          | 1.00E-17 | COP1 [ <i>Oryza sativa</i> subsp. <i>japonica</i> ]  |                                |
| Unigene137654_All          | 215            | BAD87451                      | 1        | 71                           | 6.00E-36 | Cop1 [ <i>Oryza sativa</i> subsp. <i>japonica</i> ]  | Orphans                        |
| Unigene90233_All           | 205            | ACG26686                      | 0.8      | 68                           | 2.00E-25 | LHY [ <i>Zea mays</i> ]                              |                                |

|                           |      |              |      |     |           |                                                      |              |
|---------------------------|------|--------------|------|-----|-----------|------------------------------------------------------|--------------|
| Unigene142505_All         | 272  | ACG27662     | 0.78 | 91  | 3.00E-32  | LHY [ <i>Zea mays</i> ]                              |              |
| Unigene53198_All          | 707  | BAD37964     | 0.9  | 144 | 3.00E-83  | ID1 [ <i>Oryza sativa</i> subsp. <i>japonica</i> ]   | C2H2         |
| Unigene6817_All           | 954  | BAD72204     | 0.66 | 305 | 2.00E-87  | ID1 [ <i>Oryza sativa</i> subsp. <i>japonica</i> ]   | C2H2         |
| Unigene10252_All          | 245  | BAD72204     | 0.65 | 41  | 8.00E-09  | ID1 [ <i>Oryza sativa</i> subsp. <i>japonica</i> ]   |              |
| Unigene111896_All         | 382  | BAD17526     | 0.72 | 126 | 2.00E-39  | ID1 [ <i>Oryza sativa</i> subsp. <i>japonica</i> ]   | C2H2         |
| Unigene108149_All         | 480  | ABC58220     | 0.64 | 133 | 2.00E-53  | ID1 [ <i>Lolium perenne</i> ]                        | C2H2         |
| Unigene18709_All          | 335  | ABC58220     | 0.69 | 100 | 3.00E-30  | ID1 [ <i>Lolium perenne</i> ]                        | C2H2         |
| Unigene110772_All         | 571  | AAV51392     | 0.91 | 56  | 1.00E-20  | INDETERMINATE-related protein 9 [ <i>Zea mays</i> ]  |              |
| Unigene67635_All          | 211  | NP_001151536 | 0.92 | 41  | 8.00E-14  | PRR95 [ <i>Zea mays</i> ]                            |              |
| Unigene19901_All          | 227  | NP_001151536 | 0.63 | 76  | 2.00E-19  | PRR95 [ <i>Zea mays</i> ]                            | Orphans      |
| Unigene20124_All          | 231  | NP_001151536 | 0.64 | 76  | 3.00E-22  | PRR95 [ <i>Zea mays</i> ]                            | Orphans      |
| <b>Autonomous pathway</b> |      |              |      |     |           |                                                      |              |
| Unigene72613_All          | 606  | NP_001148070 | 0.84 | 201 | 4.00E-94  | FLD [ <i>Zea mays</i> ]                              | SWI/SNF-SWI3 |
| Unigene82146_All          | 843  | Q01H90       | 0.87 | 208 | 1.00E-130 | FLD [ <i>Oryza sativa</i> subsp. <i>indica</i> ]     | SWI/SNF-SWI3 |
| Unigene138536_All         | 222  | AAT72461     | 0.83 | 73  | 2.00E-30  | FY [ <i>Lolium perenne</i> ]                         |              |
| Unigene105111_All         | 1175 | EEE56009     | 0.94 | 283 | 1.00E-161 | FY [ <i>Arabidopsis thaliana</i> ]                   |              |
| Unigene137679_All         | 215  | AAT72460     | 0.87 | 71  | 2.00E-28  | FCA [ <i>Lolium perenne</i> ]                        |              |
| Unigene3202_All           | 615  | AAQ74971     | 0.82 | 50  | 2.00E-16  | OsFCA3 [ <i>Oryza sativa</i> subsp. <i>indica</i> ]  |              |
| Unigene88285_All          | 579  | XP_001692436 | 0.57 | 42  | 3E-06     | DCL [ <i>Chlamydomonas reinhardtii</i> ]             |              |
| Unigene55543_All          | 215  | XP_001692436 | 0.48 | 47  | 8E-06     | DCL [ <i>Chlamydomonas reinhardtii</i> ]             |              |
| Unigene79914_All          | 1283 | Q10HL3       | 0.75 | 361 | 1E-180    | DCL2A [ <i>Oryza sativa</i> subsp. <i>japonica</i> ] |              |
| Unigene146116_All         | 501  | Q10HL3       | 0.8  | 166 | 8E-71     | DCL2A [ <i>Oryza sativa</i> subsp. <i>japonica</i> ] |              |
| Unigene102026_All         | 592  | Q10HL3       | 0.71 | 112 | 1E-78     | DCL2A [ <i>Oryza sativa</i> subsp. <i>japonica</i> ] |              |
| Unigene118340_All         | 2757 | Q10HL3       | 0.73 | 643 | 0.0       | DCL2A [ <i>Oryza sativa</i> subsp. <i>japonica</i> ] |              |
| Unigene143107_All         | 283  | Q5N870       | 0.91 | 94  | 8E-46     | DCL3A [ <i>Oryza sativa</i> subsp. <i>japonica</i> ] |              |
| Unigene80238_All          | 484  | Q5N870       | 0.55 | 94  | 2E-44     | DCL3A [ <i>Oryza sativa</i> subsp. <i>japonica</i> ] |              |

|                              |      |              |      |     |           |                                                                |      |
|------------------------------|------|--------------|------|-----|-----------|----------------------------------------------------------------|------|
| Unigene26771_All             | 535  | Q5N870       | 0.86 | 177 | 9E-87     | DCL3A [ <i>Oryza sativa</i> subsp. <i>japonica</i> ]           |      |
| Unigene51749_All             | 250  | Q5N870       | 0.91 | 82  | 5E-39     | DCL3A [ <i>Oryza sativa</i> subsp. <i>japonica</i> ]           |      |
| <b>Vernalization pathway</b> |      |              |      |     |           |                                                                |      |
| Unigene145322_All            | 366  | ABF97823     | 0.98 | 121 | 1.00E-65  | MSI1 [ <i>Oryza sativa</i> subsp. <i>japonica</i> ]            |      |
| <b>GA-signaling pathway</b>  |      |              |      |     |           |                                                                |      |
| Unigene126197_All            | 323  | ACN80068     | 0.92 | 105 | 2.00E-46  | d8 [ <i>Zea luxurians</i> ]                                    | GRAS |
| Unigene24443_All             | 346  | ACN80068     | 1    | 115 | 1.00E-63  | d8 [ <i>Zea luxurians</i> ]                                    | GRAS |
| Unigene67403_All             | 2122 | CAA67000     | 0.47 | 400 | 1.00E-146 | GAMyb [ <i>Oryza sativa</i> subsp. <i>indica</i> ]             | MYB  |
| Unigene114898_All            | 1403 | CAA67000     | 0.49 | 353 | 1.00E-80  | GAMyb [ <i>Oryza sativa</i> subsp. <i>indica</i> ]             | MYB  |
| Unigene41432_All             | 460  | A2WW87       | 0.81 | 116 | 3.00E-50  | GAMYB [ <i>Oryza sativa</i> subsp. <i>indica</i> ]             | MYB  |
| Unigene132859_All            | 578  | A2WW87       | 0.81 | 74  | 6.00E-60  | GAMYB [ <i>Oryza sativa</i> subsp. <i>indica</i> ]             | MYB  |
| Unigene37234_All             | 1099 | BAE92565     | 0.94 | 244 | 1.00E-135 | GAMYB [ <i>Triticum monococcum</i> ]                           | MYB  |
| Unigene5334_All              | 1589 | CAA61021     | 0.87 | 350 | 0         | GAMyb [ <i>Hordeum vulgare</i> subsp. <i>vulgare</i> ]         | MYB  |
| Unigene46215_All             | 263  | AAT40121     | 0.94 | 87  | 1.00E-39  | GAMYB-binding [ <i>Hordeum vulgare</i> subsp. <i>vulgare</i> ] | TRAF |
| Unigene66567_All             | 541  | CAJ75637     | 0.71 | 59  | 1.00E-33  | GAMYB [ <i>Brachypodium sylvaticum</i> ]                       |      |
| Unigene142610_All            | 274  | CAJ75637     | 0.85 | 80  | 1.00E-37  | GAMYB [ <i>Brachypodium sylvaticum</i> ]                       |      |
| Unigene6495_All              | 643  | CAJ75637     | 0.88 | 113 | 3.00E-54  | GAMYB [ <i>Brachypodium sylvaticum</i> ]                       |      |
| Unigene10713_All             | 537  | CAJ75637     | 0.86 | 113 | 7.00E-53  | GAMYB [ <i>Brachypodium sylvaticum</i> ]                       |      |
| Unigene32417_All             | 1513 | BAE46986     | 0.43 | 326 | 9.00E-75  | GAMYBL1 [ <i>Oryza sativa</i> subsp. <i>japonica</i> ]         | MYB  |
| Unigene67869_All             | 299  | ABM55475     | 0.77 | 57  | 4.00E-19  | GAox [ <i>Oryza sativa</i> subsp. <i>japonica</i> ]            |      |
| Unigene84529_All             | 321  | ABY49031     | 0.9  | 54  | 4.00E-35  | GA3ox [ <i>Rhynchosyza subulata</i> ]                          |      |
| Unigene31211_All             | 423  | ACU40946     | 0.91 | 93  | 3.00E-58  | GA20OX [ <i>Dasypyrum villosum</i> ]                           |      |
| Unigene35600_All             | 622  | ACU40941     | 0.82 | 63  | 4.00E-38  | GA20OX [ <i>Dasypyrum villosum</i> ]                           |      |
| Unigene139544_All            | 232  | NP_001149522 | 0.8  | 77  | 1.00E-29  | GA20OX2 [ <i>Zea mays</i> ]                                    |      |
| Unigene41987_All             | 589  | NP_001146872 | 0.85 | 48  | 3.00E-26  | gibberellin 2-beta-dioxygenase [ <i>Zea mays</i> ]             |      |
| Unigene48392_All             | 340  | CAP64326     | 0.89 | 113 | 4.00E-56  | GID1 [ <i>Saccharum officinarum</i> ]                          | NAC  |

|                                       |      |              |      |     |           |                                                         |       |
|---------------------------------------|------|--------------|------|-----|-----------|---------------------------------------------------------|-------|
| Unigene66422_All                      | 771  | CAO98733     | 0.81 | 107 | 3.00E-46  | GID1L [ <i>Hordeum vulgare</i> subsp. <i>vulgare</i> ]  |       |
| Unigene115709_All                     | 697  | CAO98733     | 0.81 | 107 | 7.00E-45  | GID1L [ <i>Hordeum vulgare</i> subsp. <i>vulgare</i> ]  |       |
| Unigene82828_All                      | 404  | NP_001150146 | 0.72 | 136 | 2.00E-46  | GID1L2 [ <i>Zea mays</i> ]                              | TIG   |
| Unigene125430_All                     | 309  | NP_001150146 | 0.78 | 100 | 5.00E-37  | GID1L2 [ <i>Zea mays</i> ]                              | TIG   |
| Unigene133170_All                     | 391  | NP_001150234 | 0.74 | 75  | 1.00E-25  | GID1L2 [ <i>Zea mays</i> ]                              |       |
| Unigene39030_All                      | 404  | NP_001150584 | 0.96 | 28  | 6.00E-09  | GID1L2 [ <i>Zea mays</i> ]                              |       |
| Unigene84542_All                      | 303  | NP_001150584 | 0.87 | 87  | 1.00E-40  | GID1L2 [ <i>Zea mays</i> ]                              |       |
| Unigene108784_All                     | 268  | NP_001151089 | 0.67 | 92  | 5.00E-24  | GID1L2 [ <i>Zea mays</i> ]                              |       |
| Unigene55148_All                      | 1038 | ACG37635     | 0.6  | 145 | 3.00E-80  | GID1L2 [ <i>Zea mays</i> ]                              |       |
| Unigene20303_All                      | 290  | NP_001152731 | 0.95 | 21  | 9.00E-07  | gibberellin-regulated protein 1 [ <i>Zea mays</i> ]     |       |
| <b>Floral meristem identity genes</b> |      |              |      |     |           |                                                         |       |
| Unigene90859_All                      | 208  | ACG28758     | 0.97 | 69  | 1.00E-29  | AP1 [ <i>Zea mays</i> ]                                 |       |
| Unigene102981_All                     | 286  | ACG28758     | 1    | 75  | 1.00E-36  | AP1 [ <i>Zea mays</i> ]                                 |       |
| Unigene1139_All                       | 656  | Q10CQ1       | 0.86 | 138 | 2.00E-58  | OsMADS14 [ <i>Oryza sativa</i> subsp. <i>japonica</i> ] | MADS  |
| Unigene26434_All                      | 484  | Q2V0P1       | 0.8  | 162 | 5.00E-70  | MADS58 [ <i>Oryza sativa</i> subsp. <i>japonica</i> ]   | MADS  |
| <b>Other flowering genes</b>          |      |              |      |     |           |                                                         |       |
| Unigene62748_All                      | 262  | BAF64440     | 0.73 | 87  | 1.00E-28  | HAP2 [ <i>Oryza sativa</i> subsp. <i>japonica</i> ]     | CCAAT |
| Unigene76546_All                      | 984  | BAF64440     | 0.68 | 303 | 1.00E-100 | HAP2 [ <i>Oryza sativa</i> subsp. <i>japonica</i> ]     | CCAAT |
| Unigene108326_All                     | 1690 | BAF64440     | 0.52 | 70  | 3.00E-08  | HAP2 [ <i>Oryza sativa</i> subsp. <i>japonica</i> ]     |       |
| Unigene26823_All                      | 545  | BAF64435     | 0.76 | 155 | 5.00E-60  | HAP2 [ <i>Oryza sativa</i> subsp. <i>japonica</i> ]     | CCAAT |
| Unigene7704_All                       | 770  | BAF64441     | 0.78 | 177 | 4.00E-73  | HAP2 [ <i>Oryza sativa</i> subsp. <i>japonica</i> ]     | CCAAT |
| Unigene13215_All                      | 945  | BAF64441     | 0.76 | 192 | 1.00E-83  | HAP2 [ <i>Oryza sativa</i> subsp. <i>japonica</i> ]     | CCAAT |
| Unigene106893_All                     | 321  | BAF64445     | 0.7  | 51  | 6.00E-12  | HAP3 [ <i>Oryza sativa</i> subsp. <i>japonica</i> ]     | CCAAT |
| Unigene27847_All                      | 580  | ABF96565     | 0.68 | 98  | 1.00E-28  | WHAP3 [ <i>Oryza sativa</i> subsp. <i>japonica</i> ]    | CCAAT |
| Unigene30887_All                      | 437  | ABF96565     | 0.73 | 140 | 8.00E-54  | WHAP3 [ <i>Oryza sativa</i> subsp. <i>japonica</i> ]    | CCAAT |

|                   |      |              |      |     |           |                                                       |           |
|-------------------|------|--------------|------|-----|-----------|-------------------------------------------------------|-----------|
| Unigene145865_All | 435  | NP_001106241 | 0.95 | 118 | 6.00E-62  | ZCN2 [ <i>Zea mays</i> ]                              |           |
| Unigene34590_All  | 486  | NP_001106241 | 0.8  | 51  | 1.00E-14  | ZCN2 [ <i>Zea mays</i> ]                              |           |
| Unigene105152_All | 657  | NP_001106253 | 0.93 | 61  | 2.00E-28  | ZCN16 [ <i>Zea mays</i> ]                             |           |
| Unigene35282_All  | 660  | NP_001151095 | 0.9  | 116 | 4.00E-57  | ARP6 [ <i>Zea mays</i> ]                              |           |
| Unigene29453_All  | 380  | A2XX39       | 0.97 | 80  | 1.00E-56  | RFL [ <i>Oryza sativa</i> subsp. <i>indica</i> ]      | LFY       |
| Unigene79416_All  | 331  | AAV33602     | 0.82 | 111 | 2.00E-45  | RFL [ <i>Oryza meridionalis</i> ]                     | LFY       |
| Unigene14137_All  | 560  | ABD15908     | 0.57 | 187 | 8.00E-50  | EMF1 [ <i>Oryza longistaminata</i> ]                  |           |
| Unigene117429_All | 452  | ABD15906     | 0.55 | 149 | 5.00E-38  | EMF1 [ <i>Oryza meridionalis</i> ]                    |           |
| Unigene80515_All  | 723  | BAD81323     | 0.49 | 201 | 2.00E-35  | EMF1 [ <i>Oryza sativa</i> subsp. <i>japonica</i> ]   |           |
| Unigene80559_All  | 239  | BAD81323     | 0.62 | 29  | 4.00E-06  | EMF1 [ <i>Oryza sativa</i> subsp. <i>japonica</i> ]   |           |
| Unigene105105_All | 1164 | BAD81323     | 0.41 | 172 | 3.00E-46  | EMF1 [ <i>Oryza sativa</i> subsp. <i>japonica</i> ]   |           |
| Unigene115434_All | 243  | BAD81323     | 0.47 | 85  | 2.00E-09  | EMF1 [ <i>Oryza sativa</i> subsp. <i>japonica</i> ]   |           |
| Unigene26696_All  | 523  | ABB92268     | 0.96 | 162 | 2.00E-92  | MSI [ <i>Triticum aestivum</i> ]                      |           |
| Unigene81301_All  | 226  | ABM81546     | 0.96 | 27  | 4.00E-08  | VIN3 [ <i>Triticum aestivum</i> ]                     |           |
| Unigene103609_All | 325  | ABM81546     | 0.79 | 108 | 1.00E-42  | VIN3 [ <i>Triticum aestivum</i> ]                     |           |
| Unigene5211_All   | 536  | ABM81546     | 0.72 | 141 | 7.00E-52  | VIN3 [ <i>Triticum aestivum</i> ]                     |           |
| Unigene9113_All   | 432  | ABM81546     | 0.74 | 144 | 3.00E-52  | VIN3 [ <i>Triticum aestivum</i> ]                     |           |
| Unigene29774_All  | 679  | ABM81546     | 0.81 | 225 | 1.00E-102 | VIN3 [ <i>Triticum aestivum</i> ]                     |           |
| Unigene27336_All  | 3034 | NP_001065771 | 0.71 | 121 | 7.00E-38  | FDR2 [ <i>Oryza sativa</i> ]                          |           |
| Unigene32114_All  | 732  | BAD45362     | 0.9  | 109 | 6.00E-51  | TFL1 [ <i>Oryza sativa</i> subsp. <i>japonica</i> ]   |           |
| Unigene19766_All  | 563  | BAD45362     | 0.87 | 33  | 1.00E-09  | TFL1 [ <i>Oryza sativa</i> subsp. <i>japonica</i> ]   |           |
| Unigene3_All      | 523  | AAR87240     | 0.75 | 44  | 1.00E-07  | AP1 [ <i>Oryza sativa</i> subsp. <i>japonica</i> ]    |           |
| Unigene2653_All   | 918  | AAR87240     | 0.61 | 103 | 3.00E-20  | AP1 [ <i>Oryza sativa</i> subsp. <i>japonica</i> ]    | MADS      |
| Unigene80271_All  | 265  | AAW78375     | 0.76 | 88  | 2.00E-29  | AP2D10 [ <i>Oryza sativa</i> subsp. <i>japonica</i> ] | AP2-EREBP |
| Unigene145190_All | 357  | AAW78375     | 0.78 | 119 | 4.00E-50  | AP2D10 [ <i>Oryza sativa</i> subsp. <i>japonica</i> ] | AP2-EREBP |
| Unigene36290_All  | 398  | ABR25960     | 0.61 | 137 | 2.00E-32  | AP2d23 [ <i>Oryza sativa</i> subsp. <i>indica</i> ]   | AP2-EREBP |

|                   |     |          |      |     |          |                                                        |           |
|-------------------|-----|----------|------|-----|----------|--------------------------------------------------------|-----------|
| Unigene126469_All | 372 | ABR25960 | 0.69 | 136 | 3.00E-41 | AP2d23 [ <i>Oryza sativa</i> subsp. <i>indica</i> ]    | AP2-EREBP |
| Unigene41092_All  | 520 | ABF95597 | 0.79 | 119 | 4.00E-71 | AP2 [ <i>Oryza sativa</i> subsp. <i>japonica</i> ]     | AP2-EREBP |
| Unigene86676_All  | 316 | ABF99086 | 0.74 | 82  | 1.00E-27 | AP2 [ <i>Oryza sativa</i> subsp. <i>japonica</i> ]     | AP2-EREBP |
| Unigene56516_All  | 904 | BAD17329 | 0.64 | 147 | 4.00E-71 | AP2 [ <i>Oryza sativa</i> subsp. <i>japonica</i> ]     | AP2-EREBP |
| Unigene9037_All   | 708 | BAD25897 | 0.67 | 237 | 8.00E-71 | AP2 [ <i>Oryza sativa</i> subsp. <i>japonica</i> ]     | AP2-EREBP |
| Unigene52813_All  | 386 | AAP83321 | 0.88 | 79  | 2.00E-36 | AP2 [ <i>Oryza sativa</i> subsp. <i>japonica</i> ]     | AP2-EREBP |
| Unigene59694_All  | 235 | BAH57731 | 0.69 | 46  | 8.00E-12 | AP2 [ <i>Triticum aestivum</i> ]                       | AP2-EREBP |
| Unigene70504_All  | 404 | BAH57730 | 0.71 | 76  | 4.00E-32 | AP2 [ <i>Triticum aestivum</i> ]                       | AP2-EREBP |
| Unigene79815_All  | 314 | BAH57731 | 0.72 | 68  | 8.00E-19 | AP2 [ <i>Triticum aestivum</i> ]                       | AP2-EREBP |
| Unigene83706_All  | 397 | BAH57731 | 0.73 | 68  | 6.00E-19 | AP2 [ <i>Triticum aestivum</i> ]                       | AP2-EREBP |
| Unigene52918_All  | 349 | ACU44657 | 0.69 | 113 | 2.00E-29 | AP2 [ <i>Oryza sativa</i> subsp. <i>indica</i> ]       | AP2-EREBP |
| Unigene54745_All  | 298 | ACU44657 | 0.65 | 93  | 3.00E-20 | AP2 [ <i>Oryza sativa</i> subsp. <i>indica</i> ]       | AP2-EREBP |
| Unigene102234_All | 345 | ACU44657 | 0.73 | 86  | 9.00E-26 | AP2 [ <i>Oryza sativa</i> subsp. <i>indica</i> ]       | AP2-EREBP |
| Unigene30435_All  | 535 | ACU44657 | 0.69 | 71  | 4.00E-18 | AP2 [ <i>Oryza sativa</i> subsp. <i>indica</i> ]       | AP2-EREBP |
| Unigene2621_All   | 766 | ABC71547 | 0.65 | 127 | 5.00E-47 | AP2 [ <i>Coix lacryma-jobi</i> ]                       | AP2-EREBP |
| Unigene37432_All  | 587 | ABC71546 | 0.79 | 127 | 2.00E-50 | AP2 [ <i>Setaria italica</i> ]                         | AP2-EREBP |
| Unigene79153_All  | 351 | ABC71546 | 0.76 | 81  | 3.00E-30 | AP2 [ <i>Setaria italica</i> ]                         | AP2-EREBP |
| Unigene43201_All  | 462 | ABY55158 | 0.98 | 64  | 4.00E-29 | AP2/EREBP [ <i>Oryza sativa</i> subsp. <i>indica</i> ] | AP2-EREBP |
| Unigene102677_All | 287 | ABY55158 | 0.91 | 95  | 3.00E-44 | AP2/EREBP [ <i>Oryza sativa</i> subsp. <i>indica</i> ] | AP2-EREBP |
| Unigene145668_All | 405 | ACJ74070 | 0.84 | 38  | 1.00E-11 | AP2/ERF [ <i>Oryza sativa</i> subsp. <i>japonica</i> ] | AP2-EREBP |
| Unigene93714_All  | 229 | AAP56252 | 0.75 | 62  | 2.00E-20 | DBF1 [ <i>Oryza sativa</i> subsp. <i>japonica</i> ]    | AP2-EREBP |
| Unigene120684_All | 283 | ABD72476 | 0.77 | 40  | 6.00E-16 | WRI1 [ <i>Brassica napus</i> ]                         | AP2-EREBP |
| Unigene136636_All | 208 | AAO38209 | 0.77 | 68  | 3.00E-25 | DRF1 [ <i>Hordeum vulgare</i> ]                        | AP2-EREBP |
| Unigene46736_All  | 605 | ABG90940 | 0.86 | 102 | 2.00E-65 | AP3 [ <i>Joinvillea ascendens</i> ]                    | MADS      |
| Unigene31051_All  | 537 | AAS48127 | 0.8  | 57  | 4.00E-38 | PI [ <i>Hordeum vulgare</i> subsp. <i>vulgare</i> ]    | MADS      |
| Unigene61519_All  | 319 | AAR32118 | 0.51 | 80  | 4.00E-12 | MADS [ <i>Dendrocalamus latiflorus</i> ]               | MADS      |

---

|                   |      |              |      |     |          |                                                         |      |
|-------------------|------|--------------|------|-----|----------|---------------------------------------------------------|------|
| Unigene122040_All | 246  | AAR32119     | 0.88 | 84  | 4.00E-35 | MADS [ <i>Dendrocalamus latiflorus</i> ]                | MADS |
| Unigene50496_All  | 851  | BAF75016     | 0.87 | 184 | 3.00E-90 | MADS [ <i>Triticum aestivum</i> ]                       | MADS |
| Unigene23470_All  | 510  | CAE53900     | 0.78 | 102 | 3.00E-39 | MADS [ <i>Triticum aestivum</i> ]                       | MADS |
| Unigene132755_All | 617  | BAD10102     | 0.73 | 78  | 8.00E-53 | MADS [ <i>Oryza sativa</i> subsp. <i>japonica</i> ]     | MADS |
| Unigene72676_All  | 417  | BAD45640     | 0.75 | 40  | 1.00E-14 | MADS [ <i>Oryza sativa</i> subsp. <i>japonica</i> ]     | MADS |
| Unigene134101_All | 494  | BAD45640     | 0.6  | 170 | 4.00E-46 | MADS [ <i>Oryza sativa</i> subsp. <i>japonica</i> ]     | MADS |
| Unigene106009_All | 313  | NP_001105152 | 0.61 | 97  | 5.00E-23 | MADS1 [ <i>Zea mays</i> ]                               | MADS |
| Unigene107374_All | 422  | NP_001105152 | 0.91 | 78  | 7.00E-34 | MADS1 [ <i>Zea mays</i> ]                               | MADS |
| Unigene44535_All  | 478  | ADA72020     | 0.86 | 51  | 5.00E-18 | MADS1 [ <i>Fargesia nitida</i> ]                        | MADS |
| Unigene93522_All  | 227  | AAT37484     | 0.88 | 34  | 8.00E-11 | MADS5 [ <i>Dendrocalamus latiflorus</i> ]               | MADS |
| Unigene105754_All | 406  | AAT37484     | 0.97 | 39  | 5.00E-15 | MADS5 [ <i>Dendrocalamus latiflorus</i> ]               | MADS |
| Unigene24549_All  | 348  | AAT37488     | 0.99 | 116 | 5.00E-59 | MADS9 [ <i>Dendrocalamus latiflorus</i> ]               | MADS |
| Unigene40100_All  | 627  | AAT37479     | 0.97 | 47  | 3.00E-21 | MADS16 [ <i>Dendrocalamus latiflorus</i> ]              | MADS |
| Unigene141320_All | 254  | AAT37480     | 1    | 84  | 3.00E-42 | MADS17 [ <i>Dendrocalamus latiflorus</i> ]              | MADS |
| Unigene43324_All  | 1381 | ACX35552     | 0.77 | 253 | 4.00E-99 | MADS17 [ <i>Oryza sativa</i> subsp. <i>japonica</i> ]   | MADS |
| Unigene65412_All  | 640  | Q0J8G8       | 0.97 | 116 | 5.00E-58 | OsMADS26 [ <i>Oryza sativa</i> subsp. <i>japonica</i> ] | MADS |
| Unigene108994_All | 507  | Q0J8G8       | 0.91 | 161 | 8.00E-76 | OsMADS26 [ <i>Oryza sativa</i> subsp. <i>japonica</i> ] | MADS |
| Unigene24617_All  | 1569 | AAO47706     | 0.81 | 53  | 2.00E-44 | MADS27 [ <i>Oryza sativa</i> subsp. <i>japonica</i> ]   | MADS |
| Unigene3264_All   | 894  | AAO47709     | 0.92 | 196 | 2.00E-99 | MADS32 [ <i>Oryza sativa</i> subsp. <i>japonica</i> ]   | MADS |
| Unigene80002_All  | 1099 | ACG37013     | 0.78 | 47  | 3.00E-27 | MADS34 [ <i>Zea mays</i> ]                              | MADS |
| Unigene132840_All | 1072 | ACG37013     | 0.69 | 102 | 1.00E-32 | MADS34 [ <i>Zea mays</i> ]                              | MADS |
| Unigene114974_All | 239  | Q69TG5       | 0.81 | 43  | 5.00E-29 | MADS55 [ <i>Oryza sativa</i> subsp. <i>japonica</i> ]   | MADS |
| Unigene20467_All  | 948  | BAD35842     | 0.84 | 171 | 4.00E-72 | MADS55 [ <i>Oryza sativa</i> subsp. <i>japonica</i> ]   | MADS |
| Unigene132147_All | 542  | AAO47712     | 0.48 | 155 | 4.00E-27 | MADS57 [ <i>Oryza sativa</i> subsp. <i>japonica</i> ]   | MADS |
| Unigene86443_All  | 350  | AAS59823     | 0.91 | 96  | 9.00E-42 | RMADS212 [ <i>Oryza sativa</i> ]                        | MADS |
| Unigene86226_All  | 310  | AAS59830     | 0.82 | 34  | 6.00E-09 | RMADS219 [ <i>Oryza sativa</i> ]                        | MADS |

---

|                   |      |          |      |     |          |                                                     |      |
|-------------------|------|----------|------|-----|----------|-----------------------------------------------------|------|
| Unigene81200_All  | 218  | CAM59056 | 0.89 | 73  | 4.00E-30 | WM12 [ <i>Triticum aestivum</i> ]                   |      |
| Unigene69728_All  | 586  | CAM59040 | 0.88 | 62  | 4.00E-38 | WM1B [ <i>Triticum aestivum</i> ]                   |      |
| Unigene28511_All  | 615  | CAM59040 | 0.83 | 134 | 2.00E-53 | WM1B [ <i>Triticum aestivum</i> ]                   |      |
| Unigene13899_All  | 920  | CAM59041 | 0.81 | 93  | 4.00E-34 | WM2 [ <i>Triticum aestivum</i> ]                    |      |
| Unigene78812_All  | 402  | CAM59068 | 0.75 | 53  | 3.00E-15 | WM22B [ <i>Triticum aestivum</i> ]                  |      |
| Unigene133536_All | 374  | CAM59077 | 0.95 | 41  | 8.00E-22 | WM29B [ <i>Triticum aestivum</i> ]                  |      |
| Unigene37578_All  | 2658 | CAM59082 | 0.76 | 56  | 2.00E-36 | WM32A [ <i>Triticum aestivum</i> ]                  | MADS |
| Unigene6831_All   | 902  | CAM59082 | 0.88 | 34  | 3.00E-25 | WM32A [ <i>Triticum aestivum</i> ]                  | MADS |
| Unigene53328_All  | 251  | CAM59043 | 0.67 | 34  | 1.00E-07 | WM3B [ <i>Triticum aestivum</i> ]                   |      |
| Unigene27372_All  | 759  | ABF57914 | 0.66 | 186 | 2.00E-57 | TaAGL1 [ <i>Triticum aestivum</i> ]                 | MADS |
| Unigene86176_All  | 473  | ABF57951 | 0.64 | 108 | 1.00E-31 | TaAGL12 [ <i>Triticum aestivum</i> ]                | MADS |
| Unigene12527_All  | 886  | ABF57951 | 0.67 | 120 | 2.00E-33 | TaAGL12 [ <i>Triticum aestivum</i> ]                | MADS |
| Unigene91358_All  | 211  | ABF57933 | 0.95 | 70  | 2.00E-32 | TaAGL31 [ <i>Triticum aestivum</i> ]                | MADS |
| Unigene59274_All  | 564  | ABF57941 | 0.41 | 85  | 1.00E-06 | TaAGL41 [ <i>Triticum aestivum</i> ]                |      |
| Unigene115464_All | 229  | ABF57941 | 0.8  | 75  | 1.00E-26 | TaAGL41 [ <i>Triticum aestivum</i> ]                | MADS |
| Unigene109537_All | 442  | ABF57947 | 0.74 | 156 | 5.00E-50 | TaAGL7 [ <i>Triticum aestivum</i> ]                 | MADS |
| Unigene50601_All  | 674  | ABZ91910 | 0.53 | 222 | 3.00E-45 | FDL6 [ <i>Triticum aestivum</i> ]                   | bZIP |
| Unigene134693_All | 476  | ABG80460 | 0.61 | 107 | 1.00E-23 | FUL [ <i>Lithachne humilis</i> ]                    | MADS |
| Unigene80969_All  | 681  | Q0JGI1   | 0.65 | 242 | 3.00E-69 | SPL2 [ <i>Oryza sativa</i> subsp. <i>japonica</i> ] | SBP  |
| Unigene122563_All | 321  | Q0JGI1   | 0.55 | 61  | 1.00E-09 | SPL2 [ <i>Oryza sativa</i> subsp. <i>japonica</i> ] | SBP  |
| Unigene13834_All  | 884  | Q0JGI1   | 0.62 | 241 | 6.00E-64 | SPL2 [ <i>Oryza sativa</i> subsp. <i>japonica</i> ] | SBP  |
| Unigene38571_All  | 929  | A2X0Q6   | 0.63 | 211 | 9.00E-61 | SPL3 [ <i>Oryza sativa</i> subsp. <i>indica</i> ]   | SBP  |
| Unigene47199_All  | 902  | A2X0Q6   | 0.65 | 191 | 3.00E-60 | SPL3 [ <i>Oryza sativa</i> subsp. <i>indica</i> ]   | SBP  |
| Unigene69564_All  | 864  | A2X0Q6   | 0.65 | 190 | 2.00E-58 | SPL3 [ <i>Oryza sativa</i> subsp. <i>indica</i> ]   | SBP  |
| Unigene129373_All | 242  | A2X0Q6   | 0.71 | 82  | 3.00E-27 | SPL3 [ <i>Oryza sativa</i> subsp. <i>indica</i> ]   | SBP  |
| Unigene36435_All  | 1404 | Q75LH6   | 0.67 | 101 | 2.00E-36 | SPL6 [ <i>Oryza sativa</i> subsp. <i>japonica</i> ] | SBP  |



|                   |     |          |      |     |           |                                                      |       |
|-------------------|-----|----------|------|-----|-----------|------------------------------------------------------|-------|
| Unigene123715_All | 255 | Q75LH6   | 0.84 | 51  | 4.00E-24  | SPL6 [ <i>Oryza sativa</i> subsp. <i>japonica</i> ]  | SBP   |
| Unigene124634_All | 304 | Q75LH6   | 0.85 | 101 | 8.00E-46  | SPL6 [ <i>Oryza sativa</i> subsp. <i>japonica</i> ]  | SBP   |
| Unigene8783_All   | 400 | Q75LH6   | 0.75 | 132 | 6.00E-49  | SPL6 [ <i>Oryza sativa</i> subsp. <i>japonica</i> ]  | SBP   |
| Unigene31770_All  | 543 | Q01KM7   | 0.82 | 158 | 1.00E-75  | SPL8 [ <i>Oryza sativa</i> subsp. <i>indica</i> ]    | SBP   |
| Unigene2551_All   | 717 | Q01KM7   | 0.87 | 246 | 1.00E-119 | SPL8 [ <i>Oryza sativa</i> subsp. <i>indica</i> ]    | SBP   |
| Unigene9005_All   | 276 | Q01KM7   | 0.75 | 98  | 2.00E-32  | SPL8 [ <i>Oryza sativa</i> subsp. <i>indica</i> ]    | SBP   |
| Unigene11540_All  | 555 | Q01KM7   | 0.77 | 149 | 5.00E-63  | SPL8 [ <i>Oryza sativa</i> subsp. <i>indica</i> ]    | SBP   |
| Unigene115408_All | 204 | Q6I576   | 0.81 | 64  | 3.00E-25  | SPL9 [ <i>Oryza sativa</i> subsp. <i>japonica</i> ]  | SBP   |
| Unigene48546_All  | 446 | A2YGR5   | 0.58 | 79  | 4.00E-13  | SPL12 [ <i>Oryza sativa</i> subsp. <i>indica</i> ]   | SBP   |
| Unigene54782_All  | 221 | A2YGR5   | 0.73 | 42  | 2.00E-11  | SPL12 [ <i>Oryza sativa</i> subsp. <i>indica</i> ]   | SBP   |
| Unigene3233_All   | 371 | A2YGR5   | 0.61 | 118 | 4.00E-30  | SPL12 [ <i>Oryza sativa</i> subsp. <i>indica</i> ]   | SBP   |
| Unigene4410_All   | 283 | A2YGR5   | 0.81 | 95  | 2.00E-34  | SPL12 [ <i>Oryza sativa</i> subsp. <i>indica</i> ]   | SBP   |
| Unigene6423_All   | 273 | A2YGR5   | 0.76 | 92  | 8.00E-32  | SPL12 [ <i>Oryza sativa</i> subsp. <i>indica</i> ]   | SBP   |
| Unigene10531_All  | 341 | A2YGR5   | 0.8  | 114 | 6.00E-44  | SPL12 [ <i>Oryza sativa</i> subsp. <i>indica</i> ]   | SBP   |
| Unigene28253_All  | 909 | A2YGR5   | 0.68 | 216 | 4.00E-74  | SPL12 [ <i>Oryza sativa</i> subsp. <i>indica</i> ]   | SBP   |
| Unigene61689_All  | 275 | Q6Z461   | 0.52 | 110 | 2.00E-18  | SPL13 [ <i>Oryza sativa</i> subsp. <i>japonica</i> ] | SBP   |
| Unigene65438_All  | 204 | Q7EXZ2   | 0.63 | 69  | 5.00E-16  | SPL14 [ <i>Oryza sativa</i> subsp. <i>japonica</i> ] | SBP   |
| Unigene9070_All   | 620 | Q6Z8M8   | 0.71 | 102 | 3.00E-39  | SPL15 [ <i>Oryza sativa</i> subsp. <i>japonica</i> ] | SBP   |
| Unigene107143_All | 239 | BAC79948 | 0.7  | 65  | 9.00E-24  | CIP7 [ <i>Oryza sativa</i> subsp. <i>japonica</i> ]  |       |
| Unigene68803_All  | 605 | BAC21482 | 0.75 | 201 | 2.00E-76  | CIP7 [ <i>Oryza sativa</i> subsp. <i>japonica</i> ]  |       |
| Unigene103010_All | 288 | AAO19379 | 0.71 | 97  | 3.00E-28  | CBF [ <i>Oryza sativa</i> subsp. <i>japonica</i> ]   | CCAAT |
| Unigene3632_All   | 867 | AAM89287 | 0.71 | 67  | 1.00E-26  | SET118 [ <i>Zea mays</i> ]                           |       |
| Unigene14074_All  | 323 | AAQ94319 | 0.86 | 67  | 4.00E-28  | MAPK6 [ <i>Zea mays</i> ]                            |       |
| Unigene31362_All  | 388 | ABB77210 | 0.97 | 128 | 3.00E-66  | EMF2 [ <i>Dendrocalamus latiflorus</i> ]             |       |
| Unigene33614_All  | 779 | ABB77210 | 0.75 | 76  | 5.00E-46  | EMF2 [ <i>Dendrocalamus latiflorus</i> ]             |       |
| Unigene33821_All  | 669 | ABB77210 | 0.92 | 198 | 1.00E-107 | EMF2 [ <i>Dendrocalamus latiflorus</i> ]             |       |

|                   |      |          |      |     |          |                                                      |             |
|-------------------|------|----------|------|-----|----------|------------------------------------------------------|-------------|
| Unigene44490_All  | 215  | ABB77210 | 0.91 | 35  | 6.00E-12 | EMF2 [ <i>Dendrocalamus latiflorus</i> ]             |             |
| Unigene57795_All  | 1977 | ABB77210 | 0.76 | 568 | 0        | EMF2 [ <i>Dendrocalamus latiflorus</i> ]             |             |
| Unigene2822_All   | 476  | ABB77210 | 0.91 | 158 | 2.00E-75 | EMF2 [ <i>Dendrocalamus latiflorus</i> ]             |             |
| Unigene109531_All | 2381 | ABB77210 | 0.77 | 610 | 0        | EMF2 [ <i>Dendrocalamus latiflorus</i> ]             |             |
| Unigene128517_All | 910  | ABB77210 | 1    | 43  | 3.00E-20 | EMF2 [ <i>Dendrocalamus latiflorus</i> ]             |             |
| Unigene132620_All | 261  | ABB77210 | 1    | 28  | 3.00E-10 | EMF2 [ <i>Dendrocalamus latiflorus</i> ]             |             |
| Unigene135222_All | 200  | ABB77210 | 1    | 66  | 5.00E-32 | EMF2 [ <i>Dendrocalamus latiflorus</i> ]             |             |
| Unigene7144_All   | 629  | ABB77210 | 0.46 | 121 | 5.00E-20 | EMF2 [ <i>Dendrocalamus latiflorus</i> ]             |             |
| Unigene15928_All  | 444  | ABB77210 | 0.94 | 35  | 9.00E-13 | EMF2 [ <i>Dendrocalamus latiflorus</i> ]             |             |
| Unigene20623_All  | 241  | ABB77210 | 0.97 | 39  | 2.00E-16 | EMF2 [ <i>Dendrocalamus latiflorus</i> ]             |             |
| Unigene39436_All  | 996  | BAD08170 | 0.83 | 181 | 9.00E-78 | myb [ <i>Oryza sativa</i> subsp. <i>japonica</i> ]   | G2-like     |
| Unigene74701_All  | 463  | BAD08170 | 0.78 | 52  | 3.00E-15 | myb [ <i>Oryza sativa</i> subsp. <i>japonica</i> ]   | G2-like     |
| Unigene69295_All  | 415  | BAC99778 | 0.85 | 142 | 6.00E-59 | myb [ <i>Oryza sativa</i> subsp. <i>japonica</i> ]   | G2-like     |
| Unigene39749_All  | 371  | ACG40365 | 0.84 | 59  | 3.00E-20 | myb [ <i>Zea mays</i> ]                              | G2-like     |
| Unigene132434_All | 267  | BAD04039 | 0.57 | 82  | 1.00E-16 | Myb [ <i>Oryza glaberrima</i> ]                      | MYB         |
| Unigene33935_All  | 391  | ACF22740 | 0.71 | 35  | 1.00E-12 | Myb [ <i>Brachypodium distachyon</i> ]               | MYB         |
| Unigene85953_All  | 310  | ACF22740 | 0.56 | 110 | 1.00E-24 | Myb [ <i>Brachypodium distachyon</i> ]               | MYB         |
| Unigene86125_All  | 294  | ACF22740 | 0.61 | 95  | 4.00E-25 | Myb [ <i>Brachypodium distachyon</i> ]               | MYB         |
| Unigene123027_All | 362  | ACF22740 | 0.57 | 83  | 2.00E-17 | Myb [ <i>Brachypodium distachyon</i> ]               |             |
| Unigene14193_All  | 690  | ACF22745 | 0.65 | 120 | 6.00E-42 | Myb [ <i>Brachypodium distachyon</i> ]               | MYB         |
| Unigene48736_All  | 671  | AAU43823 | 0.5  | 130 | 8.00E-26 | myb [ <i>Hordeum vulgare</i> subsp. <i>vulgare</i> ] | MYB         |
| Unigene78343_All  | 333  | AAU43823 | 0.76 | 56  | 8.00E-14 | myb [ <i>Hordeum vulgare</i> subsp. <i>vulgare</i> ] | MYB-related |
| Unigene97176_All  | 265  | AAU43823 | 0.51 | 93  | 3.00E-16 | myb [ <i>Hordeum vulgare</i> subsp. <i>vulgare</i> ] | MYB         |
| Unigene131947_All | 246  | AAU43823 | 0.79 | 62  | 6.00E-20 | myb [ <i>Hordeum vulgare</i> subsp. <i>vulgare</i> ] | MYB-related |
| Unigene142790_All | 277  | AAU43823 | 0.53 | 102 | 1.00E-20 | myb [ <i>Hordeum vulgare</i> subsp. <i>vulgare</i> ] | MYB         |
| Unigene145394_All | 372  | AAU43823 | 0.7  | 98  | 1.00E-22 | myb [ <i>Hordeum vulgare</i> subsp. <i>vulgare</i> ] | MYB         |

|                   |      |              |      |     |           |                                                         |             |
|-------------------|------|--------------|------|-----|-----------|---------------------------------------------------------|-------------|
| Unigene80280_All  | 306  | BAH03544     | 0.67 | 37  | 2.00E-11  | Myb [ <i>Triticum aestivum</i> ]                        | MYB         |
| Unigene82248_All  | 290  | BAH03544     | 0.62 | 94  | 2.00E-22  | Myb [ <i>Triticum aestivum</i> ]                        | MYB         |
| Unigene98705_All  | 288  | BAH03544     | 0.81 | 104 | 3.00E-42  | Myb [ <i>Triticum aestivum</i> ]                        | MYB         |
| Unigene113090_All | 628  | BAH03544     | 0.89 | 139 | 5.00E-64  | Myb [ <i>Triticum aestivum</i> ]                        | MYB         |
| Unigene138629_All | 223  | BAH03544     | 0.8  | 81  | 4.00E-30  | Myb [ <i>Triticum aestivum</i> ]                        | MYB         |
| Unigene90677_All  | 207  | AAK08983     | 0.71 | 52  | 4.00E-15  | JAMyb [ <i>Oryza sativa</i> subsp. <i>japonica</i> ]    | MYB         |
| Unigene99116_All  | 296  | AAK08983     | 0.61 | 109 | 1.00E-27  | JAMyb [ <i>Oryza sativa</i> subsp. <i>japonica</i> ]    | MYB         |
| Unigene26956_All  | 575  | AAK08983     | 0.71 | 142 | 3.00E-51  | JAMyb [ <i>Oryza sativa</i> subsp. <i>japonica</i> ]    | MYB         |
| Unigene83396_All  | 1013 | ABC86569     | 0.63 | 178 | 7.00E-80  | TaMYB1 [ <i>Triticum aestivum</i> ]                     | MYB         |
| Unigene116944_All | 1045 | ABC86569     | 0.79 | 177 | 2.00E-73  | TaMYB1 [ <i>Triticum aestivum</i> ]                     | MYB         |
| Unigene5888_All   | 775  | ABC86569     | 0.78 | 37  | 1.00E-07  | TaMYB1 [ <i>Triticum aestivum</i> ]                     |             |
| Unigene142562_All | 273  | ABC86569     | 0.77 | 83  | 3.00E-33  | TaMYB1 [ <i>Triticum aestivum</i> ]                     | MYB         |
| Unigene138939_All | 226  | BAD17383     | 0.92 | 75  | 5.00E-34  | MYB [ <i>Oryza sativa</i> subsp. <i>japonica</i> ]      | MYB-related |
| Unigene6382_All   | 843  | BAD17383     | 0.67 | 280 | 1.00E-102 | MYB [ <i>Oryza sativa</i> subsp. <i>japonica</i> ]      | MYB-related |
| Unigene33568_All  | 566  | ABQ01978     | 0.69 | 193 | 2.00E-67  | MYBA1 [ <i>Aeluropus littoralis</i> ]                   | MYB         |
| Unigene4837_All   | 652  | ABA96597     | 0.68 | 44  | 2.00E-13  | MYB10 [ <i>Oryza sativa</i> subsp. <i>japonica</i> ]    | MYB         |
| Unigene93551_All  | 228  | CAC85051     | 0.74 | 81  | 2.00E-22  | Myb13 [ <i>Oryza sativa</i> ]                           | MYB         |
| Unigene119190_All | 279  | CAC85051     | 0.72 | 102 | 1.00E-25  | Myb13 [ <i>Oryza sativa</i> ]                           | MYB         |
| Unigene7844_All   | 202  | NP_001105086 | 0.87 | 66  | 5.00E-27  | myb2 [ <i>Zea mays</i> ]                                | MYB         |
| Unigene18567_All  | 204  | NP_001105086 | 0.85 | 68  | 4.00E-26  | myb2 [ <i>Zea mays</i> ]                                | MYB         |
| Unigene120895_All | 260  | NP_001152064 | 0.72 | 91  | 4.00E-30  | Myb4 [ <i>Zea mays</i> ]                                | MYB         |
| Unigene83677_All  | 318  | AAZ20440     | 0.82 | 81  | 2.00E-48  | MYB24 [ <i>Malus x domestica</i> ]                      | MYB         |
| Unigene21051_All  | 1608 | ACN85217     | 0.8  | 339 | 1.00E-146 | MYBCC [ <i>Oryza punctata</i> ]                         | G2-like     |
| Unigene29196_All  | 1246 | ACN85217     | 0.82 | 274 | 1.00E-126 | MYBCC [ <i>Oryza punctata</i> ]                         | G2-like     |
| Unigene29951_All  | 1001 | NP_001152613 | 0.8  | 256 | 1.00E-113 | MYBCC [ <i>Zea mays</i> ]                               | G2-like     |
| Unigene50444_All  | 531  | CAA50221     | 0.82 | 63  | 3.00E-22  | MybHv5 [ <i>Hordeum vulgare</i> subsp. <i>vulgare</i> ] | MYB         |

|                   |     |              |      |     |           |                                                            |             |
|-------------------|-----|--------------|------|-----|-----------|------------------------------------------------------------|-------------|
| Unigene87052_All  | 270 | CAA50221     | 0.83 | 65  | 1.00E-24  | MybHv5 [ <i>Hordeum vulgare</i> subsp. <i>vulgare</i> ]    | MYB         |
| Unigene88739_All  | 383 | ABA96851     | 0.86 | 113 | 7.00E-55  | Myb [ <i>Oryza sativa</i> subsp. <i>japonica</i> ]         | MYB         |
| Unigene24026_All  | 650 | ABA96851     | 0.91 | 215 | 1.00E-117 | Myb [ <i>Oryza sativa</i> subsp. <i>japonica</i> ]         | MYB         |
| Unigene92718_All  | 221 | NP_001150001 | 0.84 | 73  | 1.00E-29  | myb [ <i>Zea mays</i> ]                                    | G2-like     |
| Unigene115034_All | 419 | NP_001150001 | 0.7  | 94  | 4.00E-28  | myb [ <i>Zea mays</i> ]                                    | G2-like     |
| Unigene106225_All | 465 | ABA99223     | 0.82 | 84  | 3.00E-33  | Myb-related [ <i>Oryza sativa</i> subsp. <i>japonica</i> ] | MYB-related |
| Unigene17231_All  | 771 | ABA99223     | 0.81 | 93  | 2.00E-36  | Myb-related [ <i>Oryza sativa</i> subsp. <i>japonica</i> ] | MYB-related |
| Unigene42110_All  | 278 | NP_001149973 | 0.68 | 92  | 6.00E-28  | myb-related [ <i>Zea mays</i> ]                            | MYB-related |
| Unigene86396_All  | 417 | BAF80451     | 0.96 | 33  | 7.00E-20  | MYB-related [ <i>Nicotiana tabacum</i> ]                   | MYB         |
| Unigene81181_All  | 217 | P42863       | 1    | 32  | 3E-11     | G6PIB [ <i>Oryza sativa</i> subsp. <i>japonica</i> ]       |             |
| Unigene137069_All | 211 | P49105       | 0.98 | 69  | 3E-32     | G6PI [ <i>Zea mays</i> ]                                   |             |
| Unigene20126_All  | 231 | P49105       | 0.88 | 75  | 3E-32     | G6PI [ <i>Zea mays</i> ]                                   |             |
| Unigene22230_All  | 275 | P49105       | 0.97 | 91  | 1E-45     | G6PI [ <i>Zea mays</i> ]                                   |             |
| Unigene14854_All  | 495 | BAD10250     | 0.85 | 164 | 4E-79     | SKB1 [ <i>Oryza sativa</i> subsp. <i>japonica</i> ]        |             |
| Unigene76655_All  | 838 | BAD10250     | 0.82 | 108 | 3E-42     | SKB1 [ <i>Oryza sativa</i> subsp. <i>japonica</i> ]        |             |
| Unigene120966_All | 892 | BAD10250     | 0.83 | 133 | 6E-57     | SKB1 [ <i>Oryza sativa</i> subsp. <i>japonica</i> ]        |             |
